# Supplementary material
Source: PubMed Central journal article supplement (PMC7758971)
Supplement: ao0c04706_si_003.pdf [file ao0c04706_si_003.pdf]

# Supporting information

## **Regioselective Synthesis of Chromones via Cyclocarbonylative Sonogashira Coupling Catalyzed by Highly Active Bridged-Bis(N- Heterocyclic Carbene)Palladium(II) Complexes**

Waseem Mansour, Mohammed Fettouhi, Bassam El Ali\*

*Chemistry Department, King Fahd University of Petroleum & Minerals, Dhahran 31261,  
Saudi Arabia*

## Contents

- $^1\text{H}$  NMR and  $^{13}\text{C}$  NMR spectra for new pre-ligands and complexes.....S3-S10
- $^1\text{H}$  NMR and  $^{13}\text{C}$  NMR spectra for the products.....S11-S25
- ESI spectra of complexes C1-C3.....S26-S27

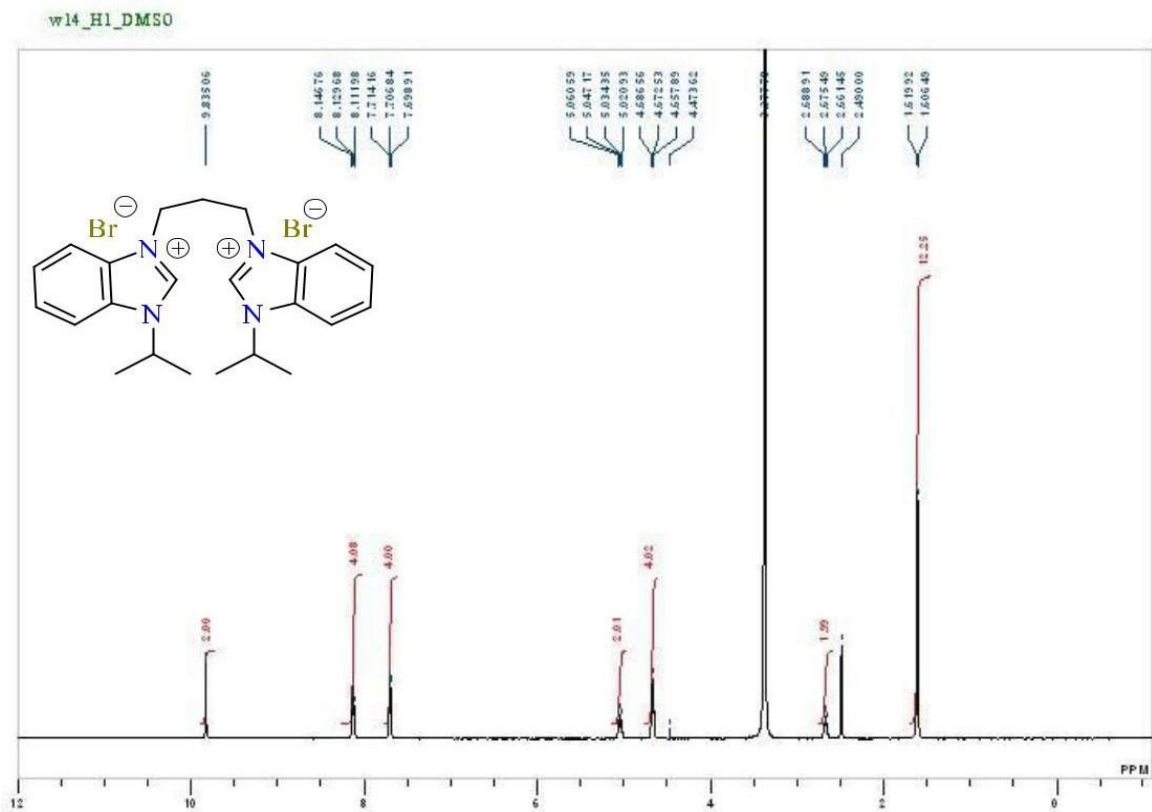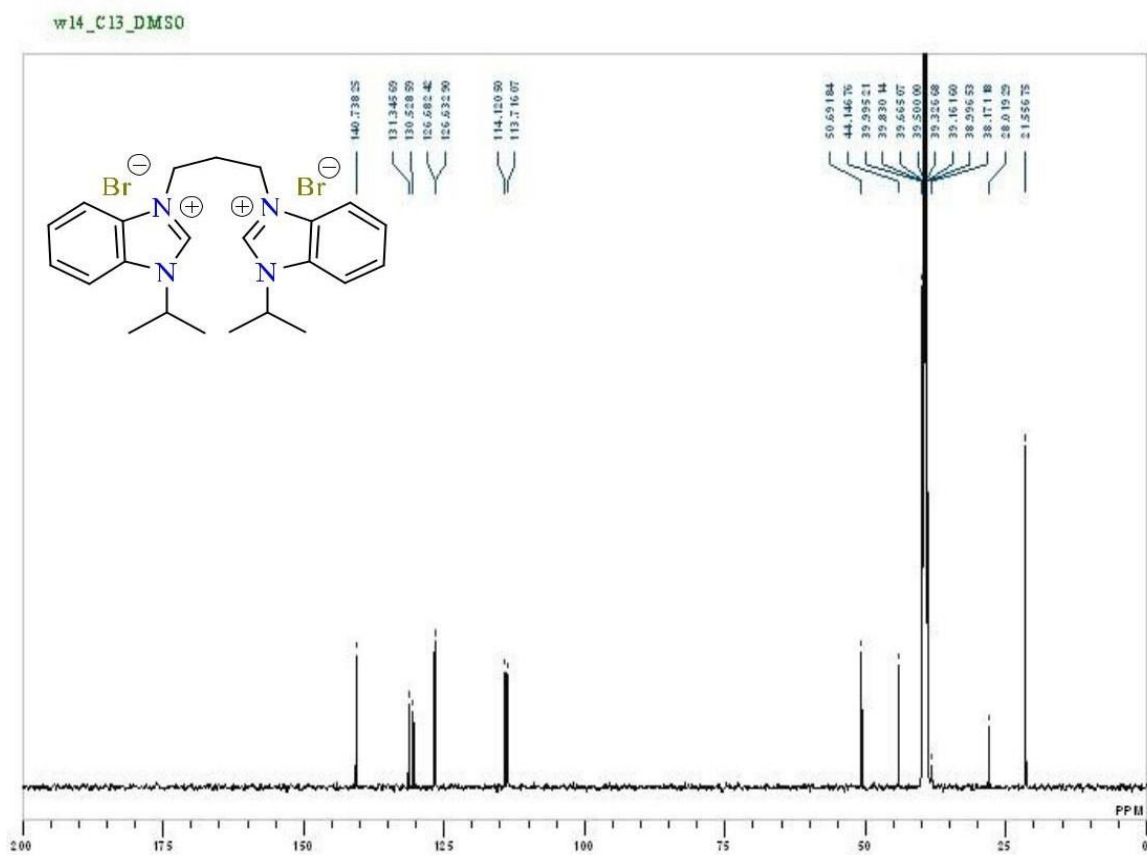

Figure S1.  $^1\text{H}$  NMR and  $^{13}\text{C}$  NMR spectra of pre-ligand L1

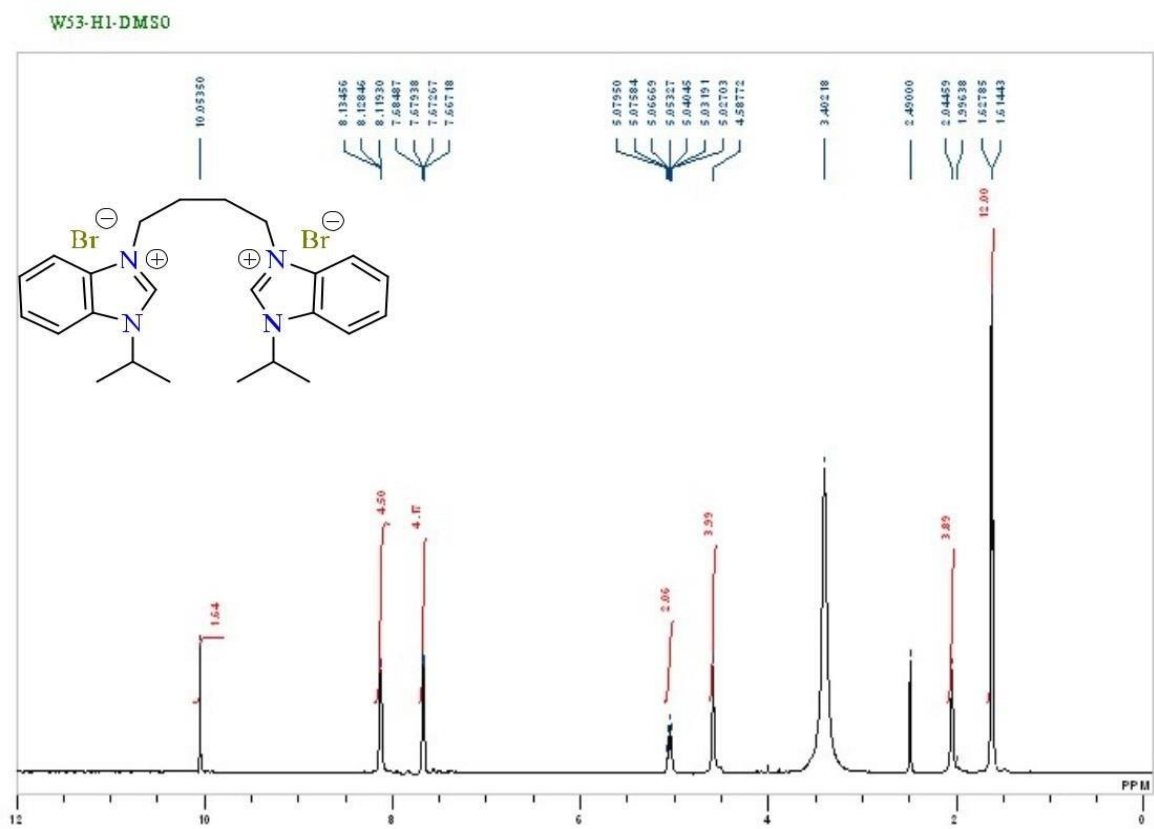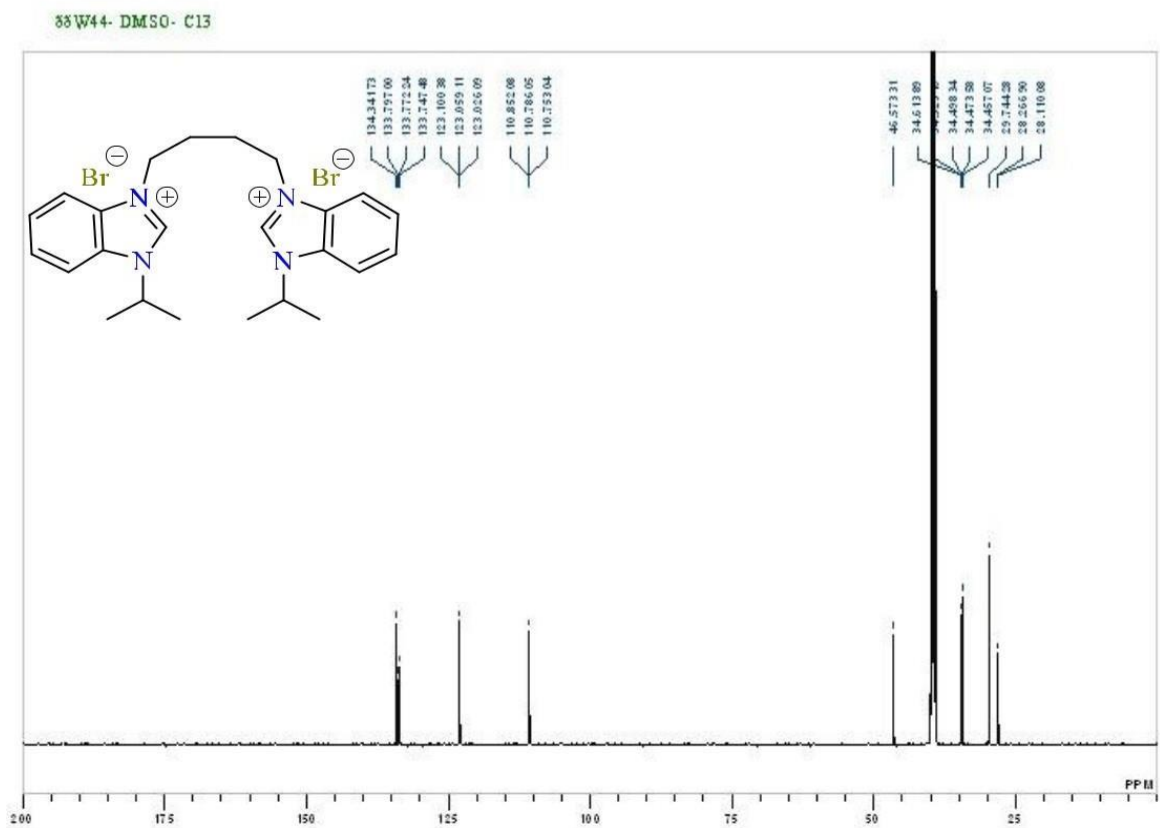

Figure S2. <sup>1</sup>H NMR and <sup>13</sup>C NMR spectra of pre-ligand L2



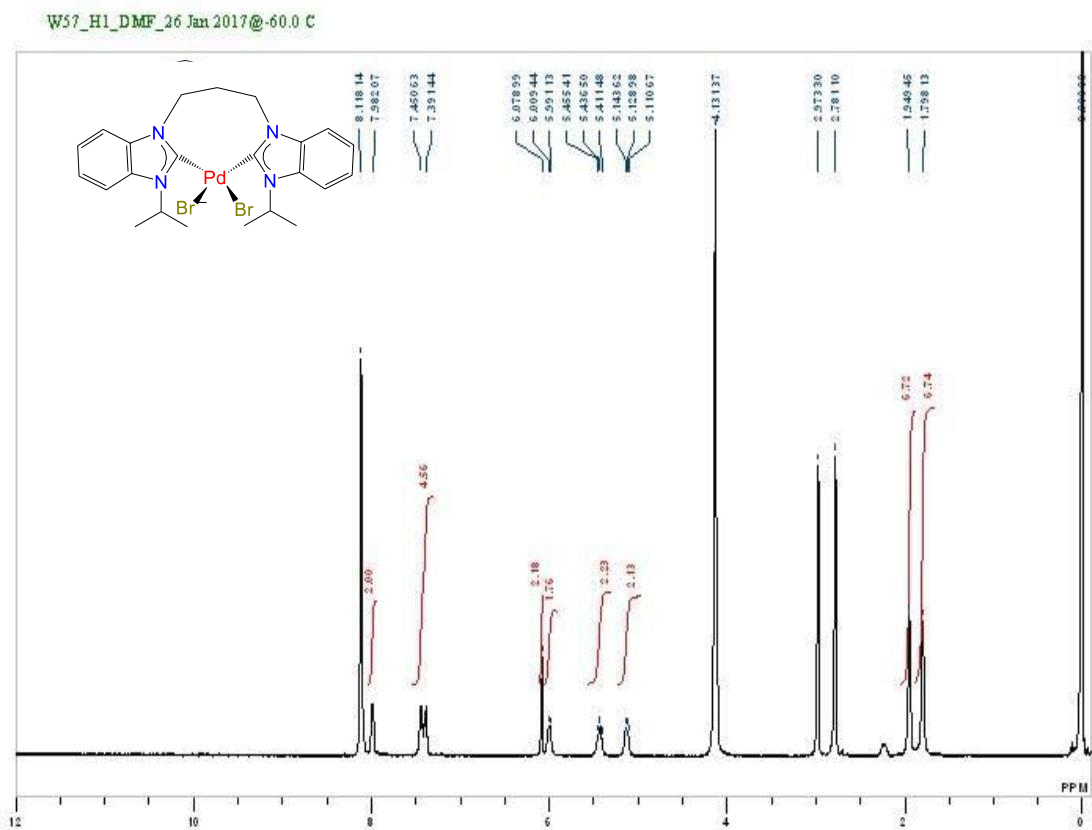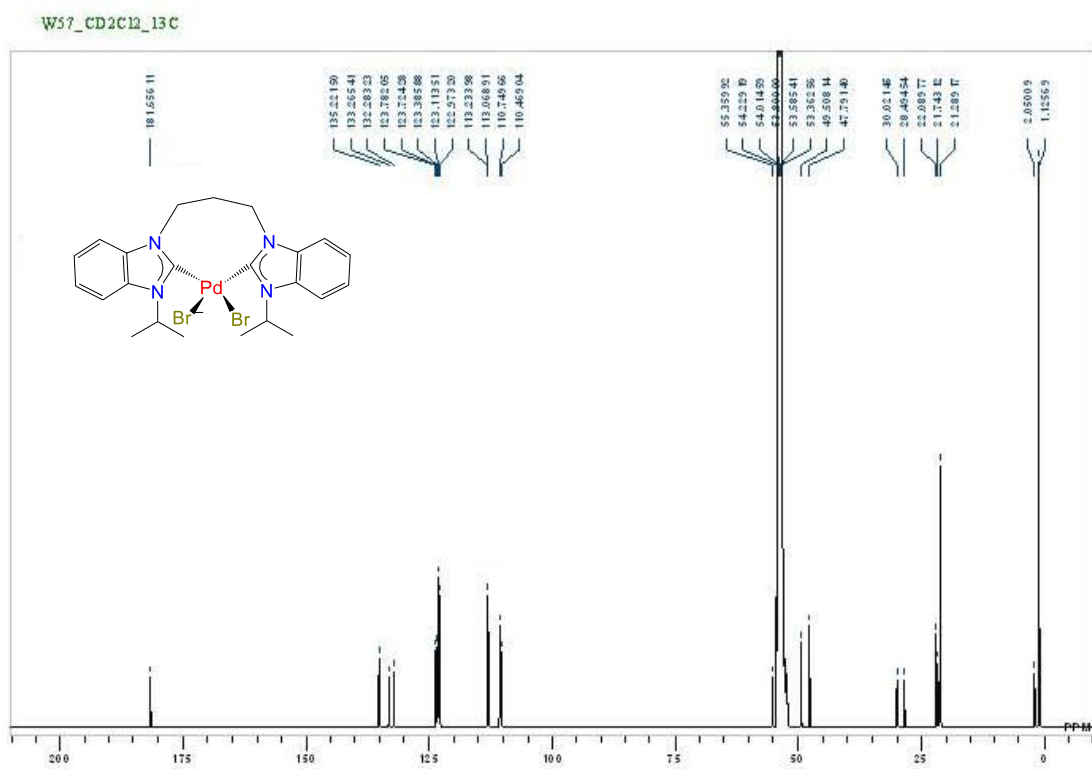

Figure S4. <sup>1</sup>H NMR and <sup>13</sup>C NMR spectra of complex C1

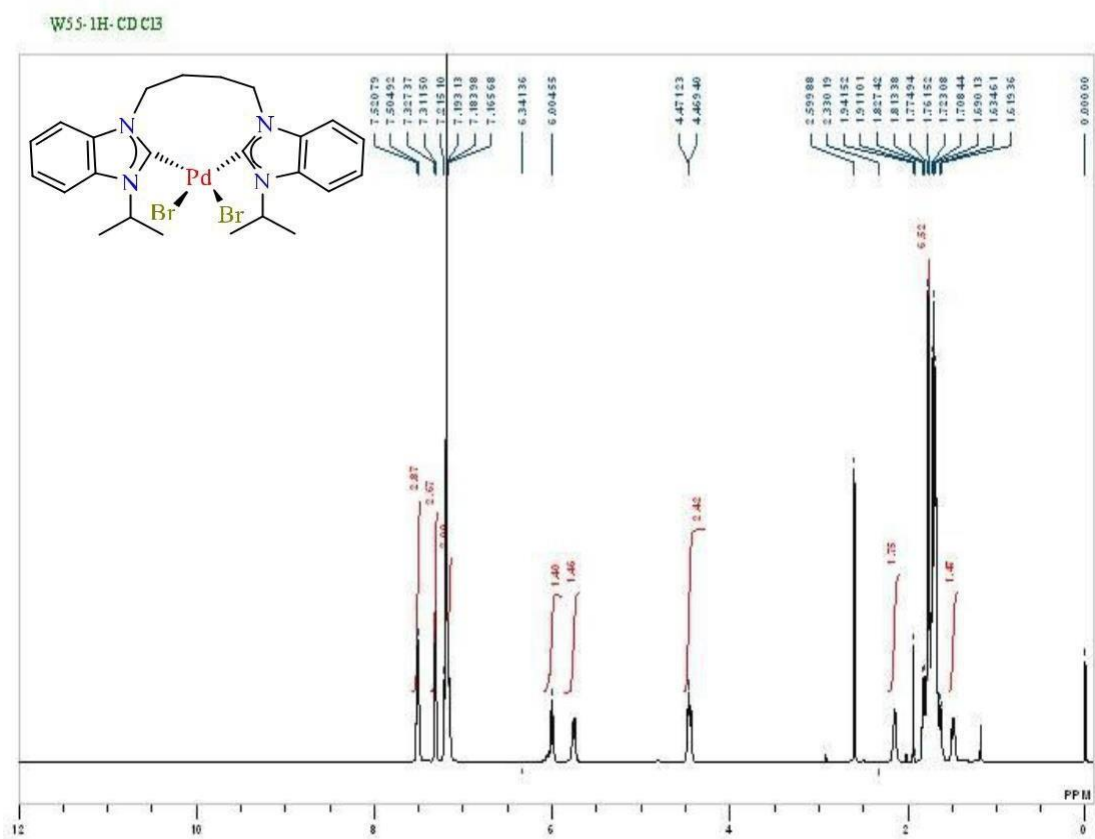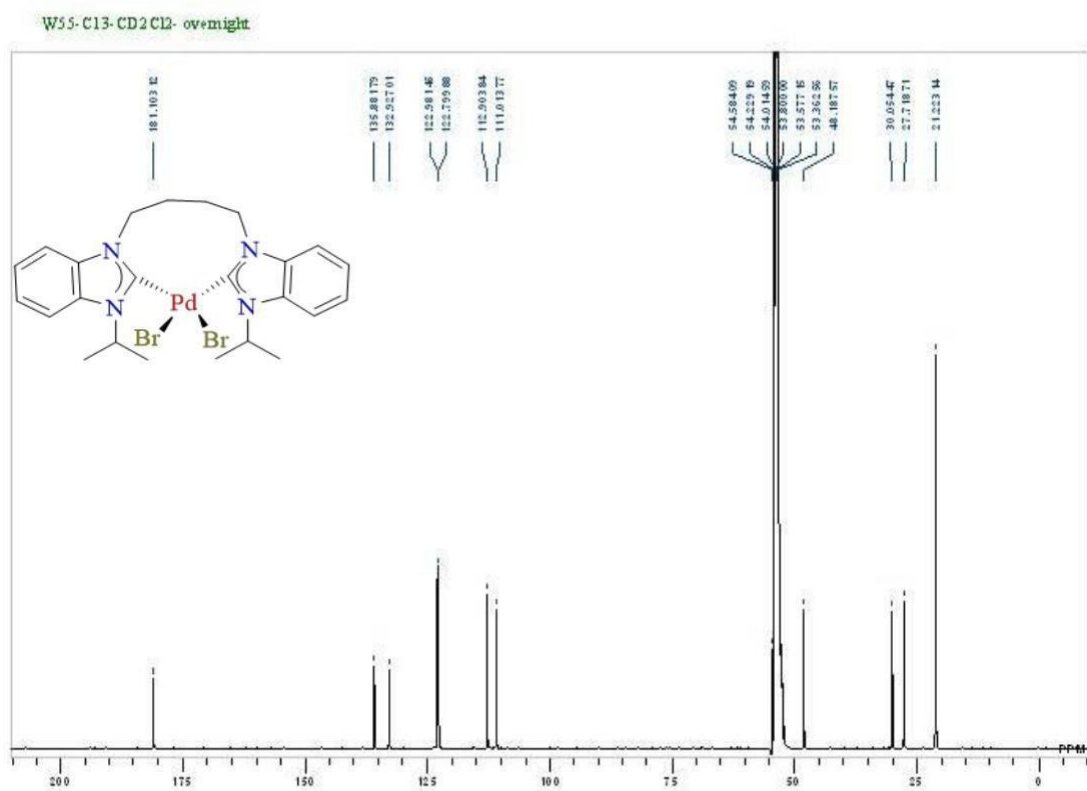

Figure S5. <sup>1</sup>H NMR and <sup>13</sup>C NMR spectra of complex C2

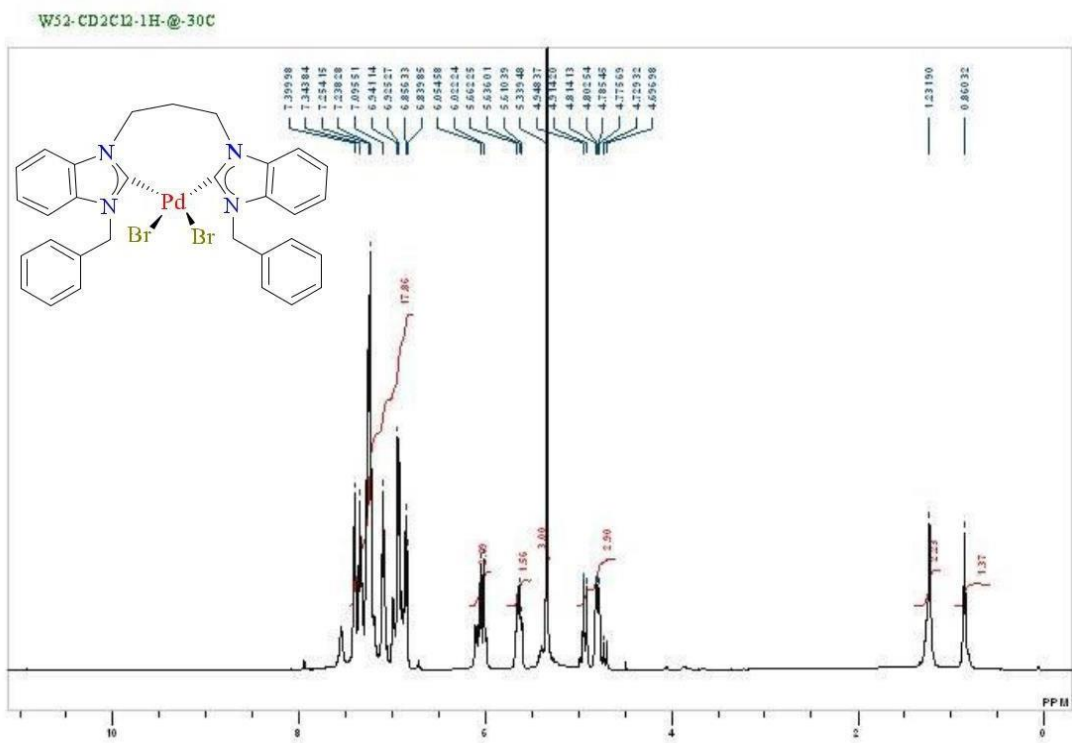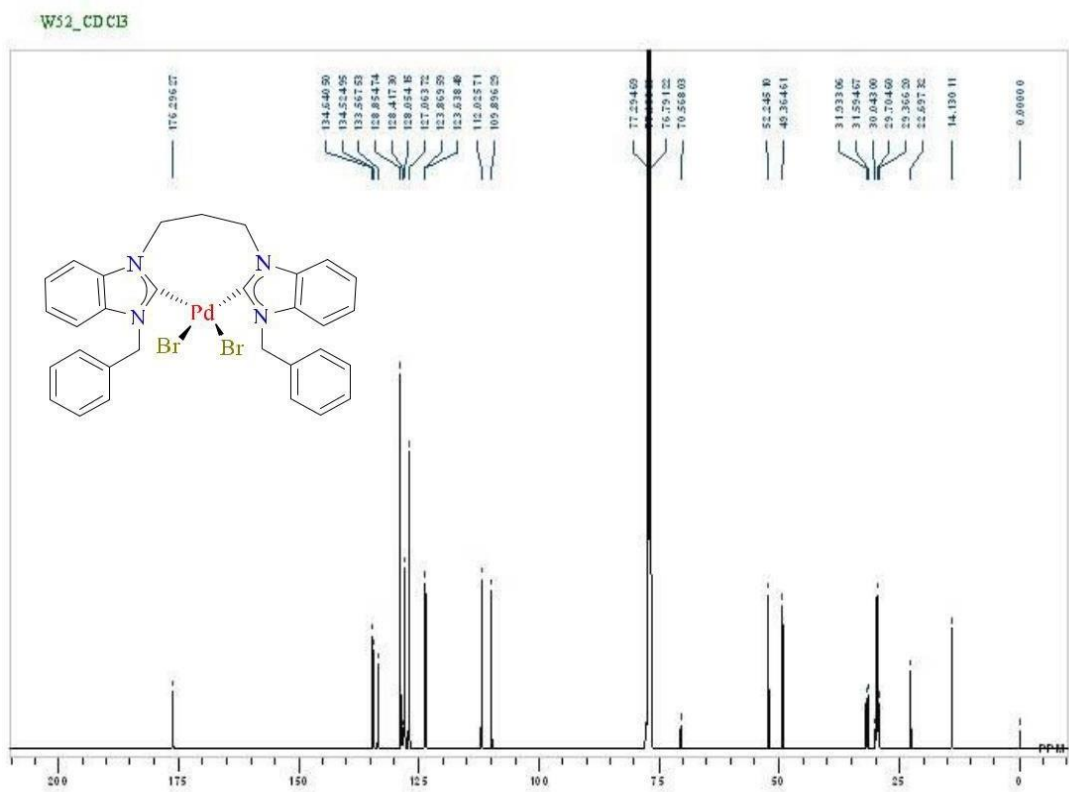

Figure S6.  $^1\text{H}$  NMR and  $^{13}\text{C}$  NMR spectra of complex C3



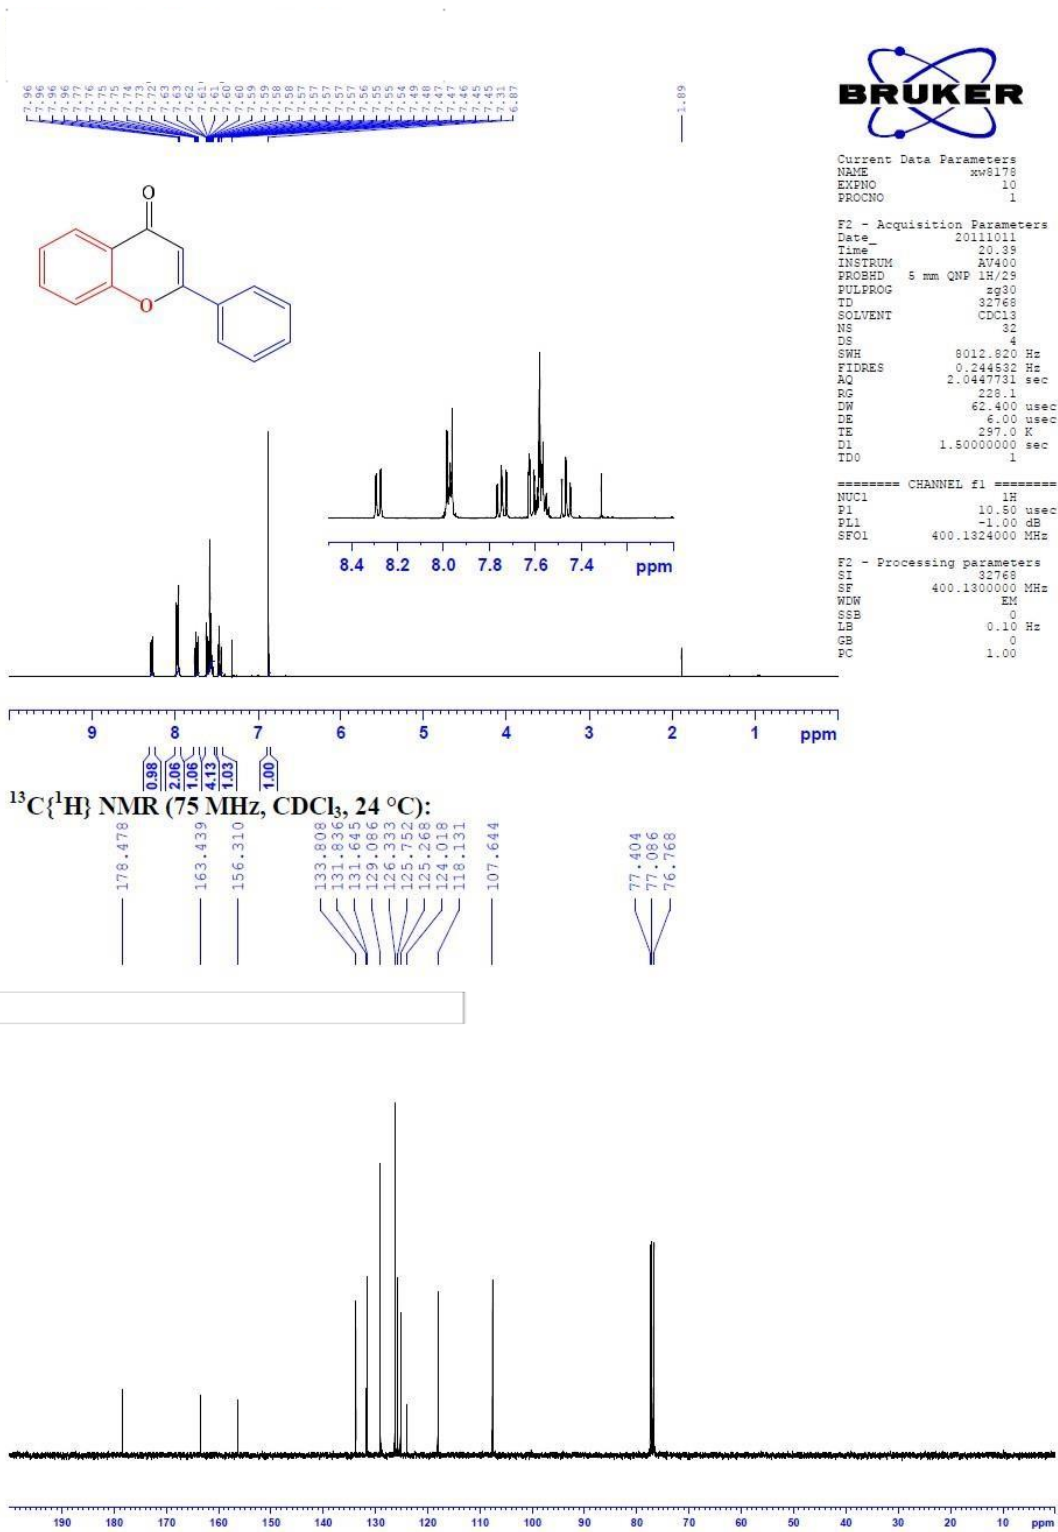

**Figure S7.**  $^1\text{H}$  NMR and  $^{13}\text{C}$  NMR spectra of product 3aa

$^1\text{H}$  NMR (300 MHz,  $\text{CDCl}_3$ , 24 °C):

Wu XW8196

AulH CDC13 /opt/topspin 1110 40

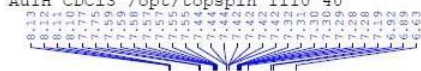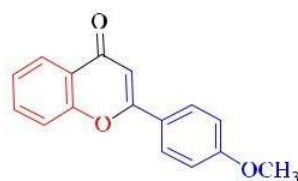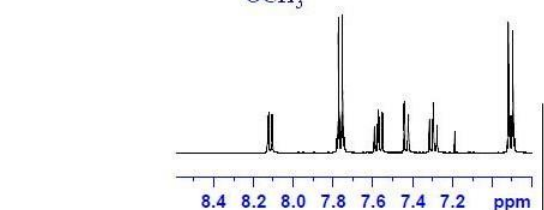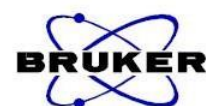

Current Data Parameters  
NAME XW8196  
EXPNO 10  
PROCNO 1

F2 - Acquisition Parameters  
Date\_ 20111013  
Time 8.08  
INSTRUM AV400  
PROBHD 5 mm QNP 1H/29  
PULPROG zg30  
TD 32768  
SOLVENT CDCl3  
NS 32  
DS 4  
SWH 8012.820 Hz  
FIDRES 0.244532 Hz  
AQ 2.0447731 sec  
RG 128  
DW 62.400 usec  
DE 6.00 usec  
TE 297.0 K  
D1 1.5000000 sec  
TD0 1

===== CHANNEL f1 =====  
NUC1 1H  
P1 10.50 usec  
PL1 -1.00 dB  
SF01 400.1324000 MHz

F2 - Processing parameters  
SI 32768  
SF 400.1300500 MHz  
WDW EM  
SSB 0  
LB 0.10 Hz  
GB 0  
PC 1.00

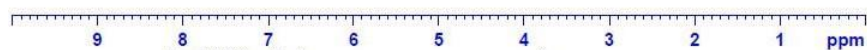

$^{13}\text{C}\{^1\text{H}\}$  NMR (75 MHz,  $\text{CDCl}_3$ , 24 °C):

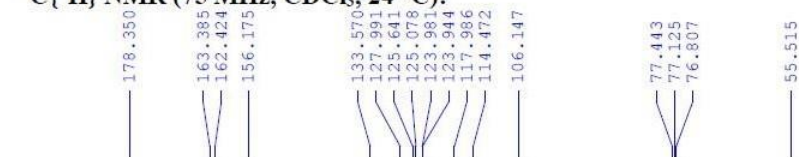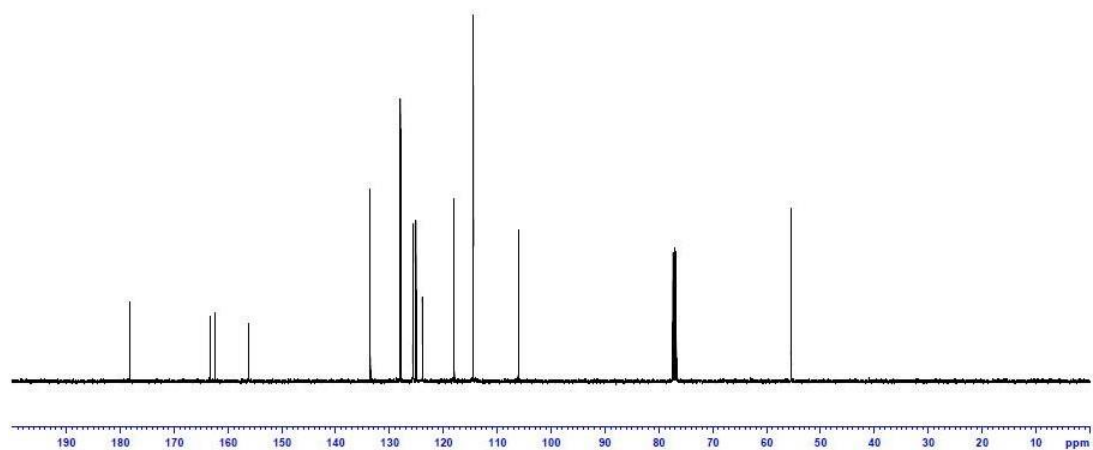

Figure S8.  $^1\text{H}$  NMR and  $^{13}\text{C}$  NMR spectra of product 3ab

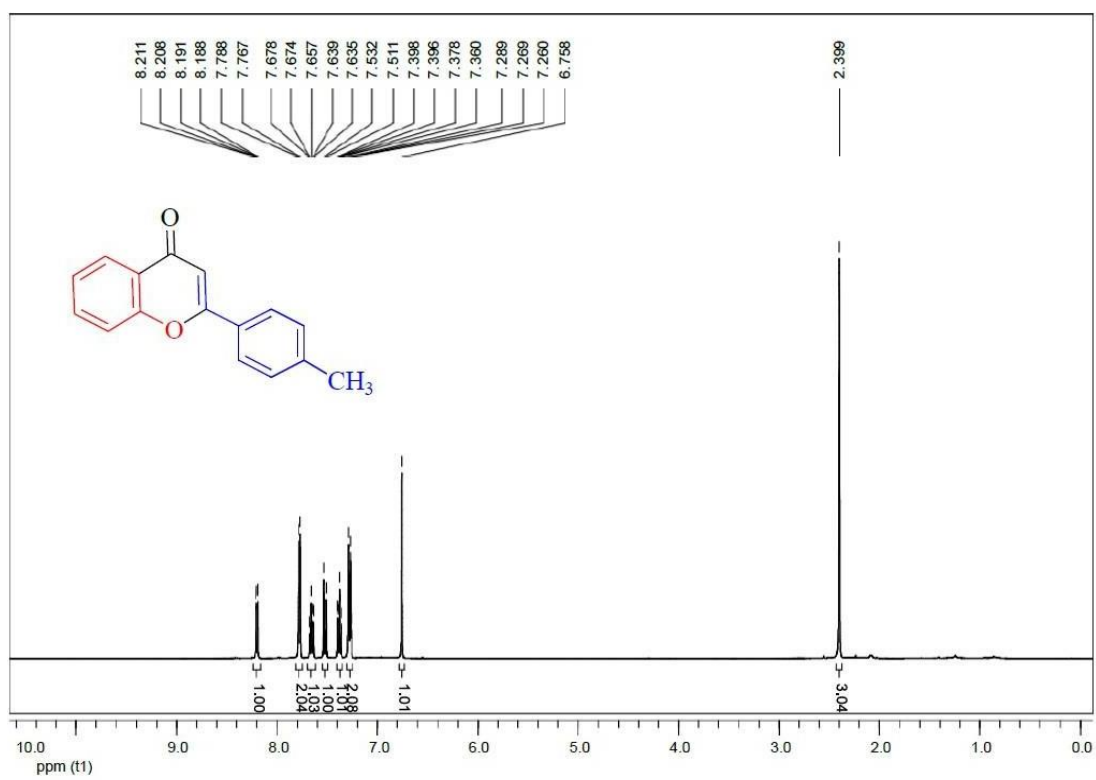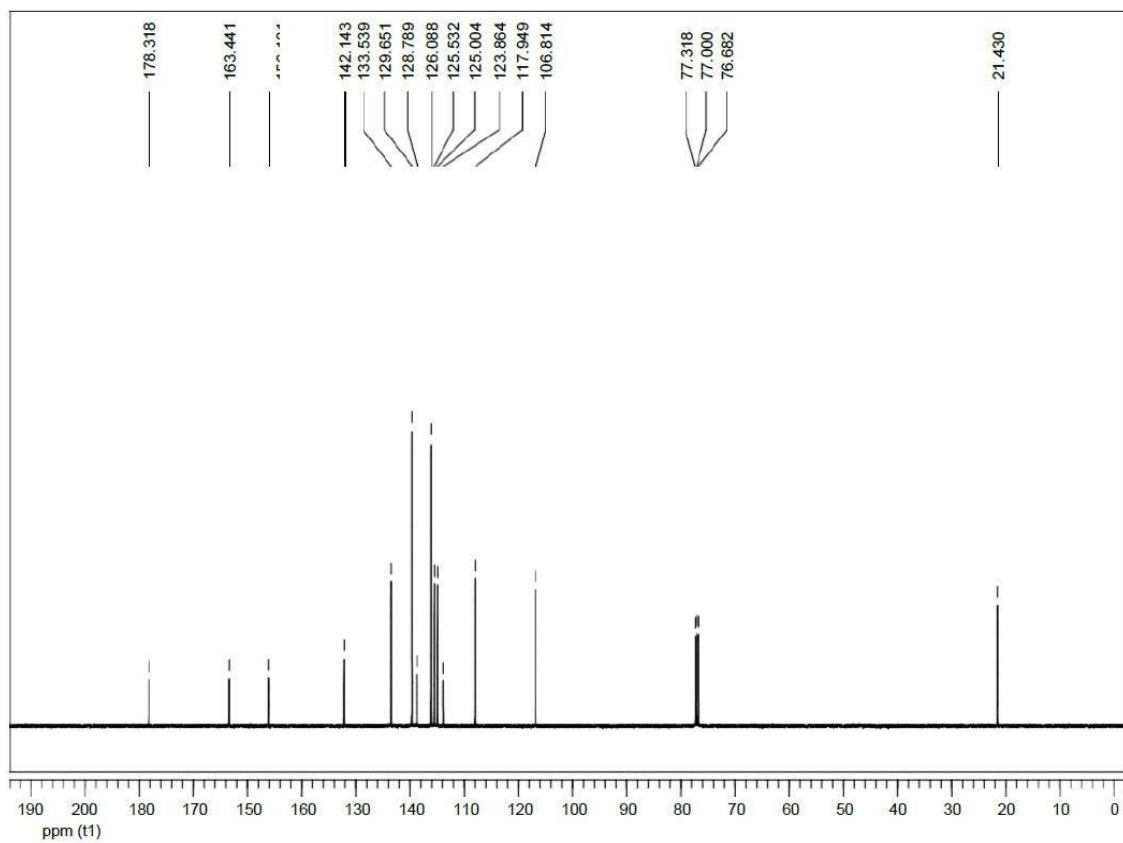

**Figure S9.**  $^1\text{H}$  NMR and  $^{13}\text{C}$  NMR spectra of product 3ac

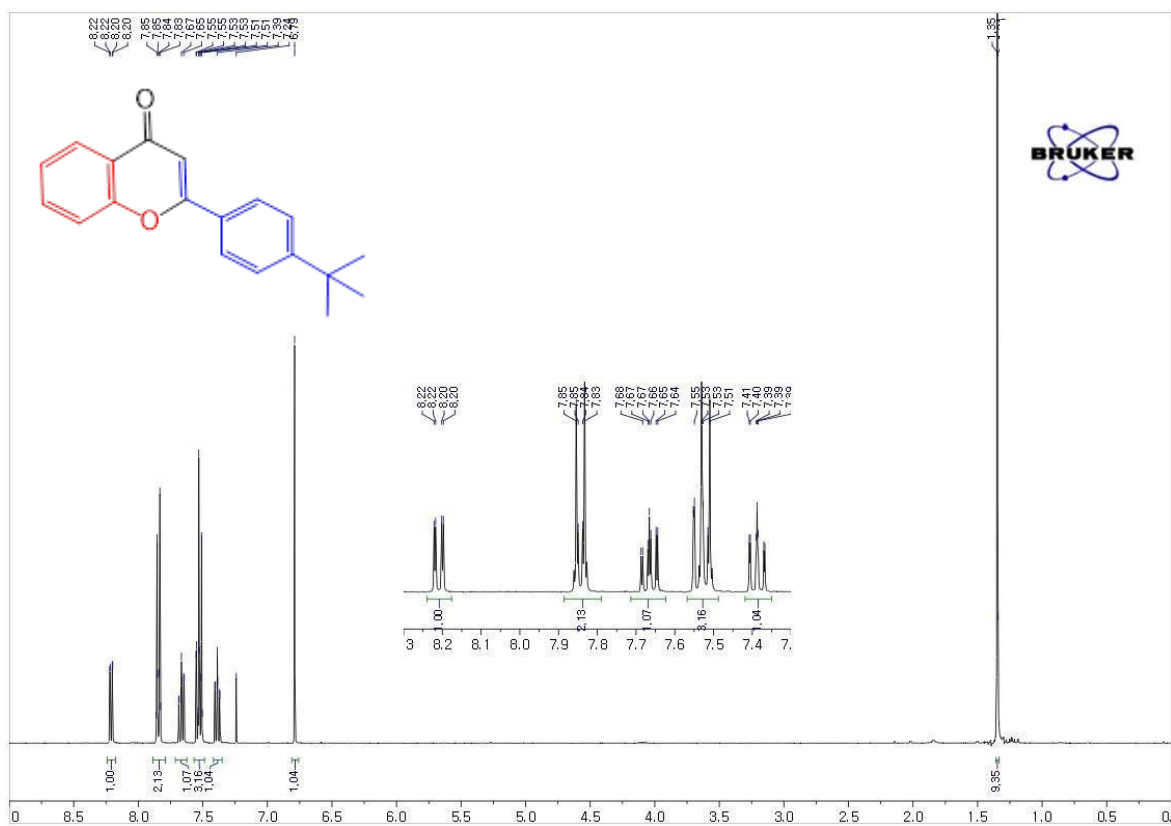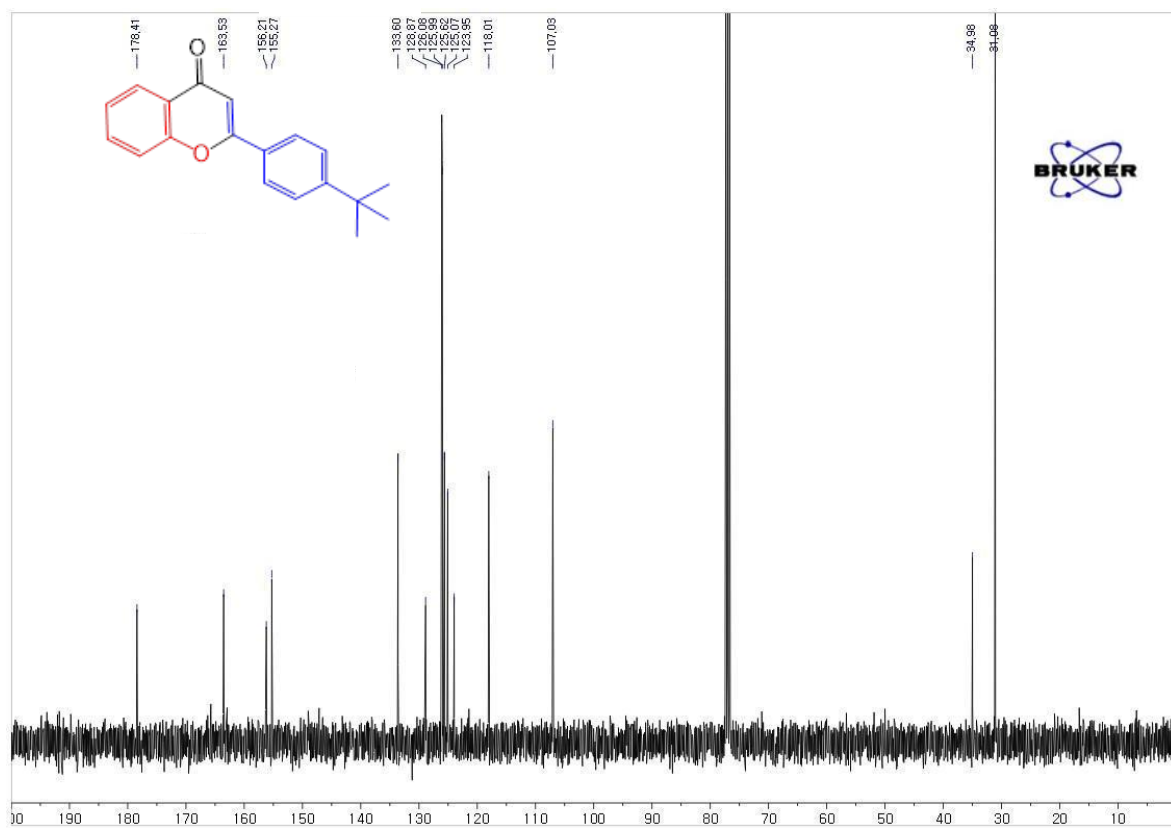

**Figure S10.** <sup>1</sup>H NMR and <sup>13</sup>C NMR spectra of product 3ad

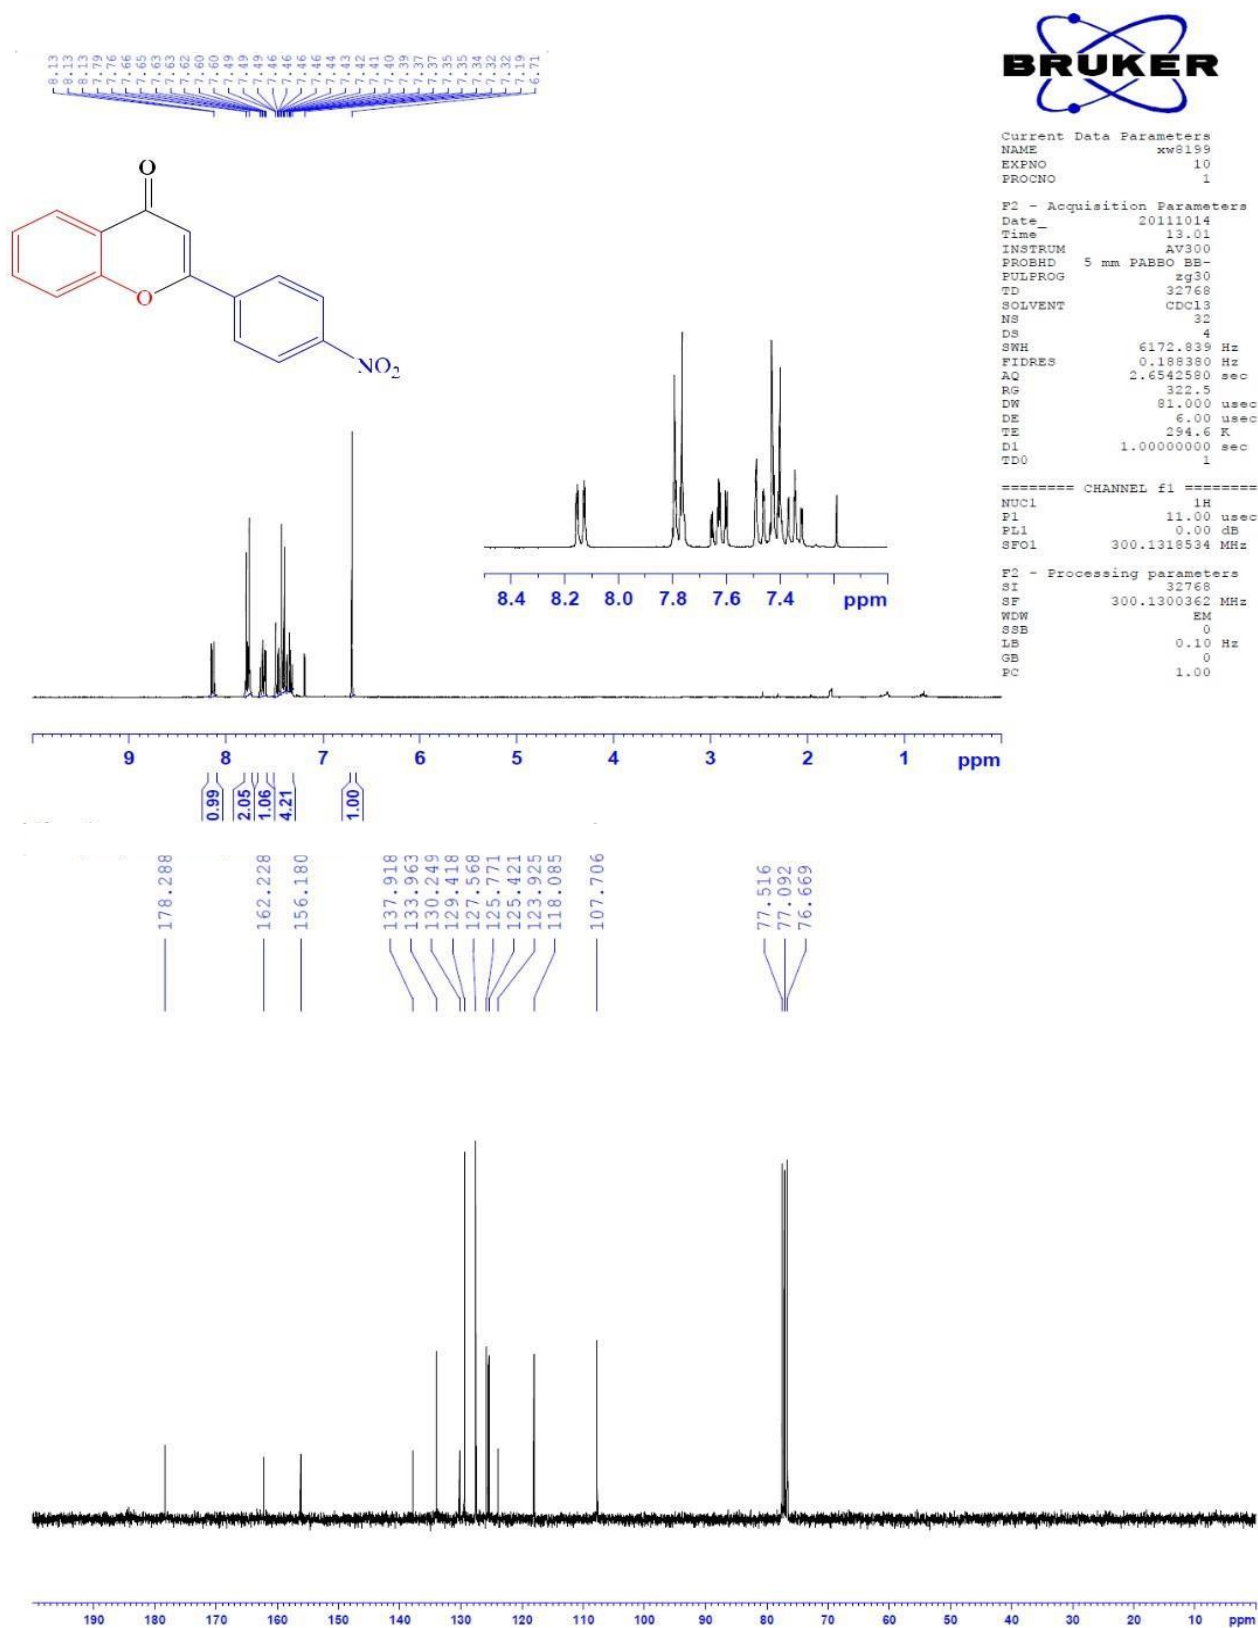

**Figure S11.** <sup>1</sup>H NMR and <sup>13</sup>C NMR spectra of product 3ae

**$^1\text{H}$  NMR (300 MHz,  $\text{CDCl}_3$ , 24 °C):**

Wu XW8216

AulH  $\text{CDCl}_3$  /opt/topspin 1111 25

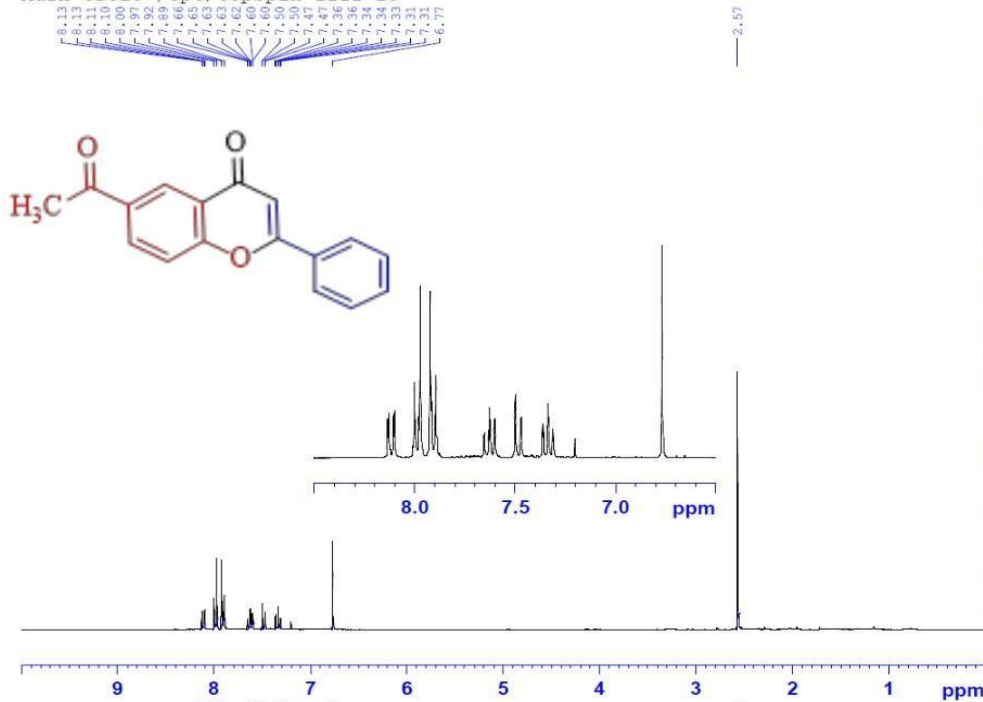

**$^{13}\text{C}\{^1\text{H}\}$  NMR (75 MHz,  $\text{CDCl}_3$ , 24 °C):**

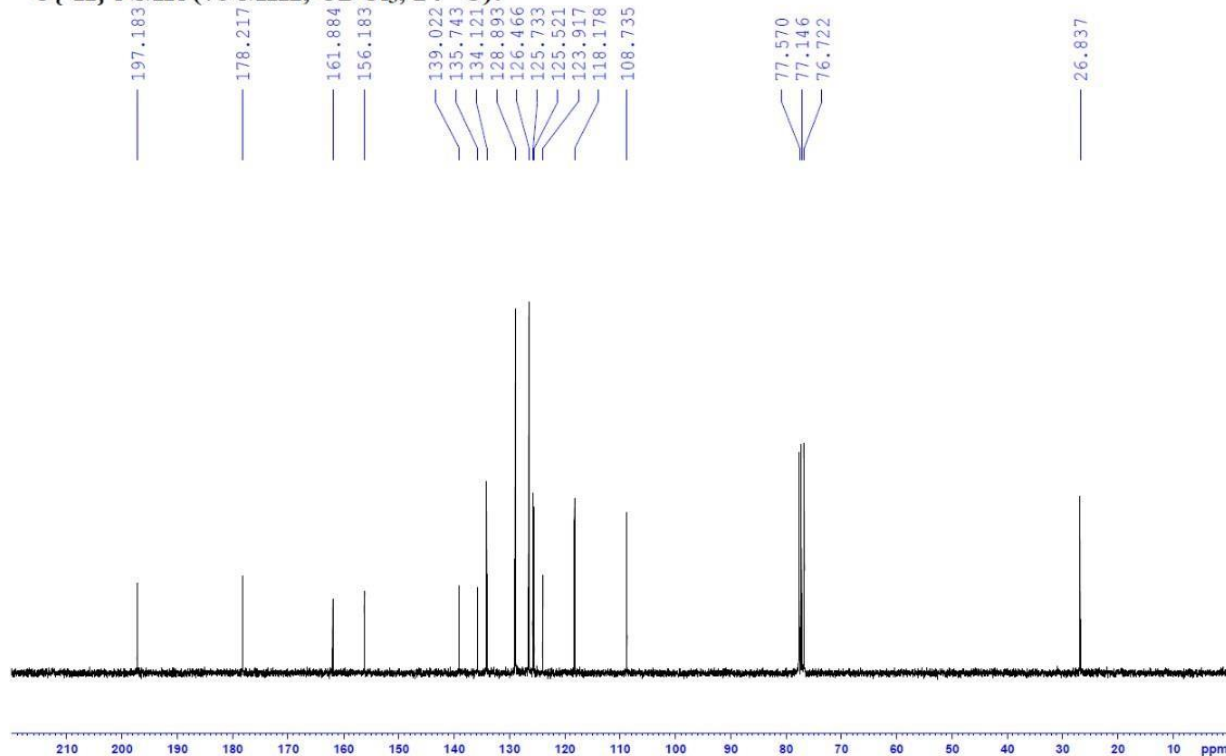

**Figure S12.**  $^1\text{H}$  NMR and  $^{13}\text{C}$  NMR spectra of product 3ba

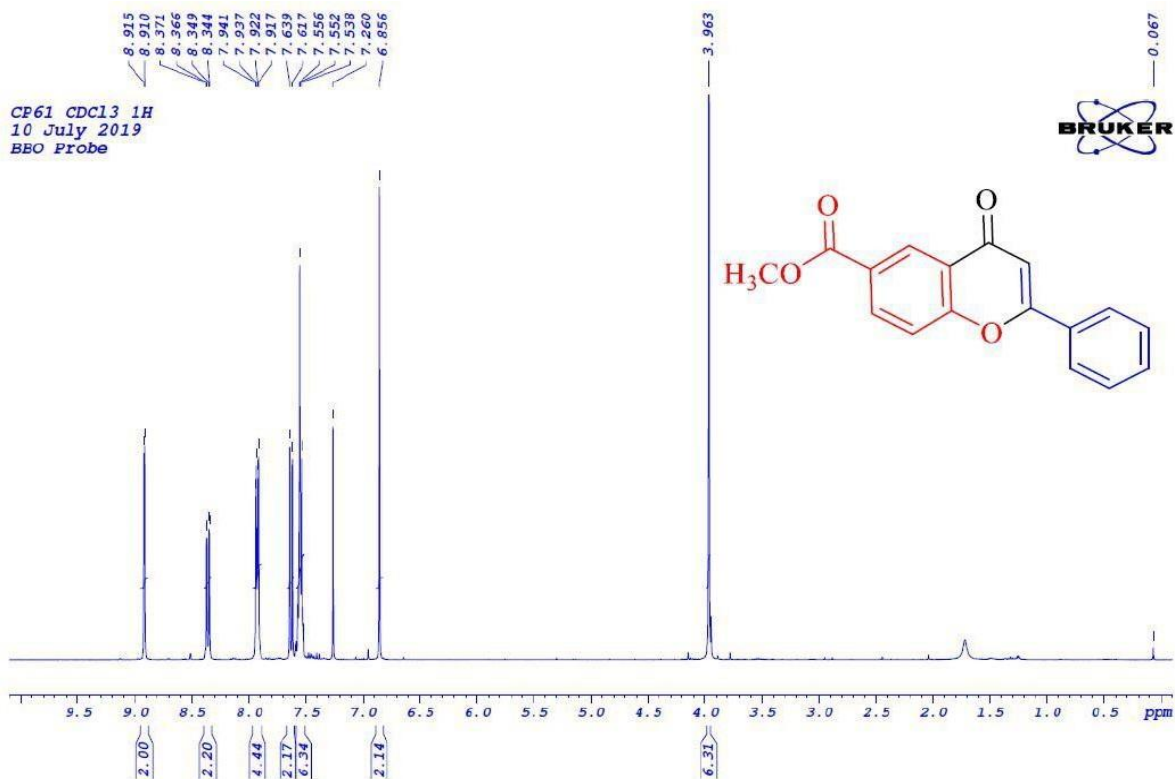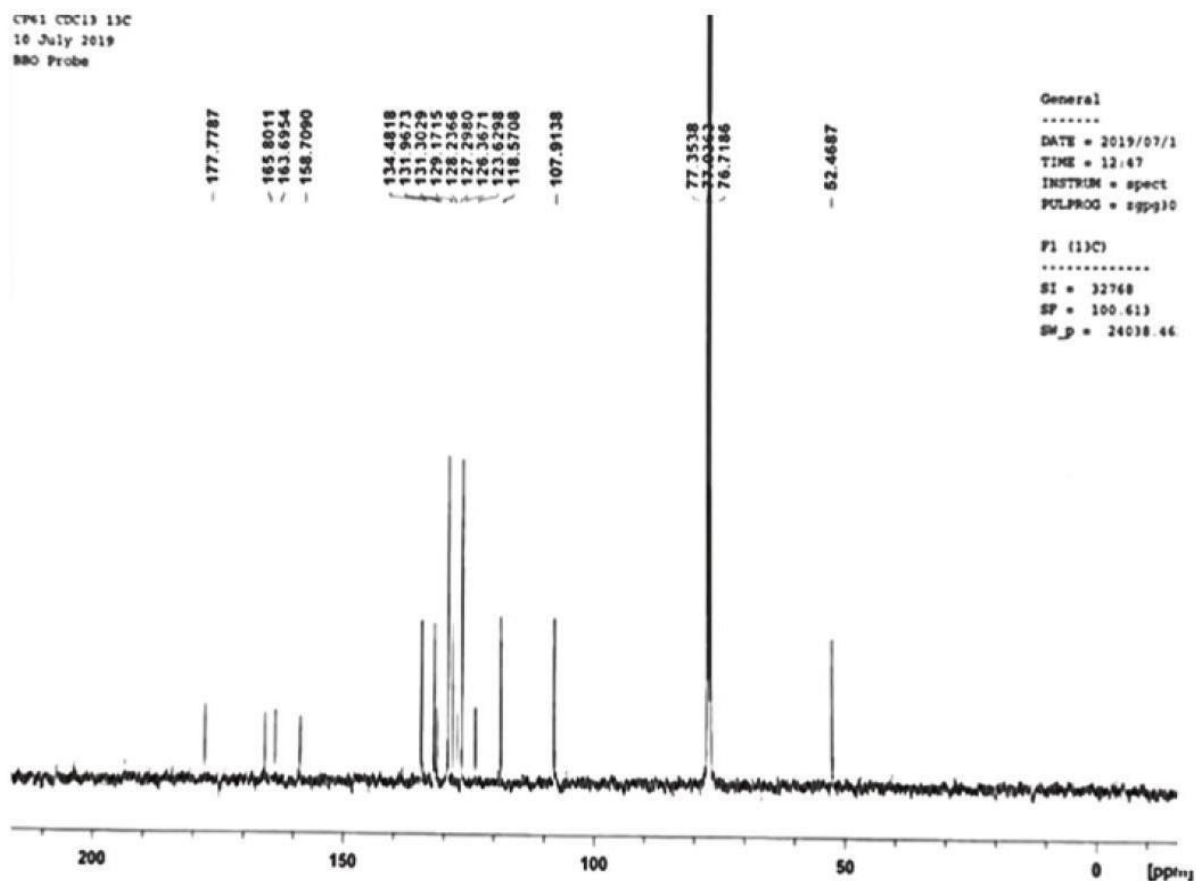

Figure S13.  $^1\text{H}$  NMR and  $^{13}\text{C}$  NMR spectra of product 3ca

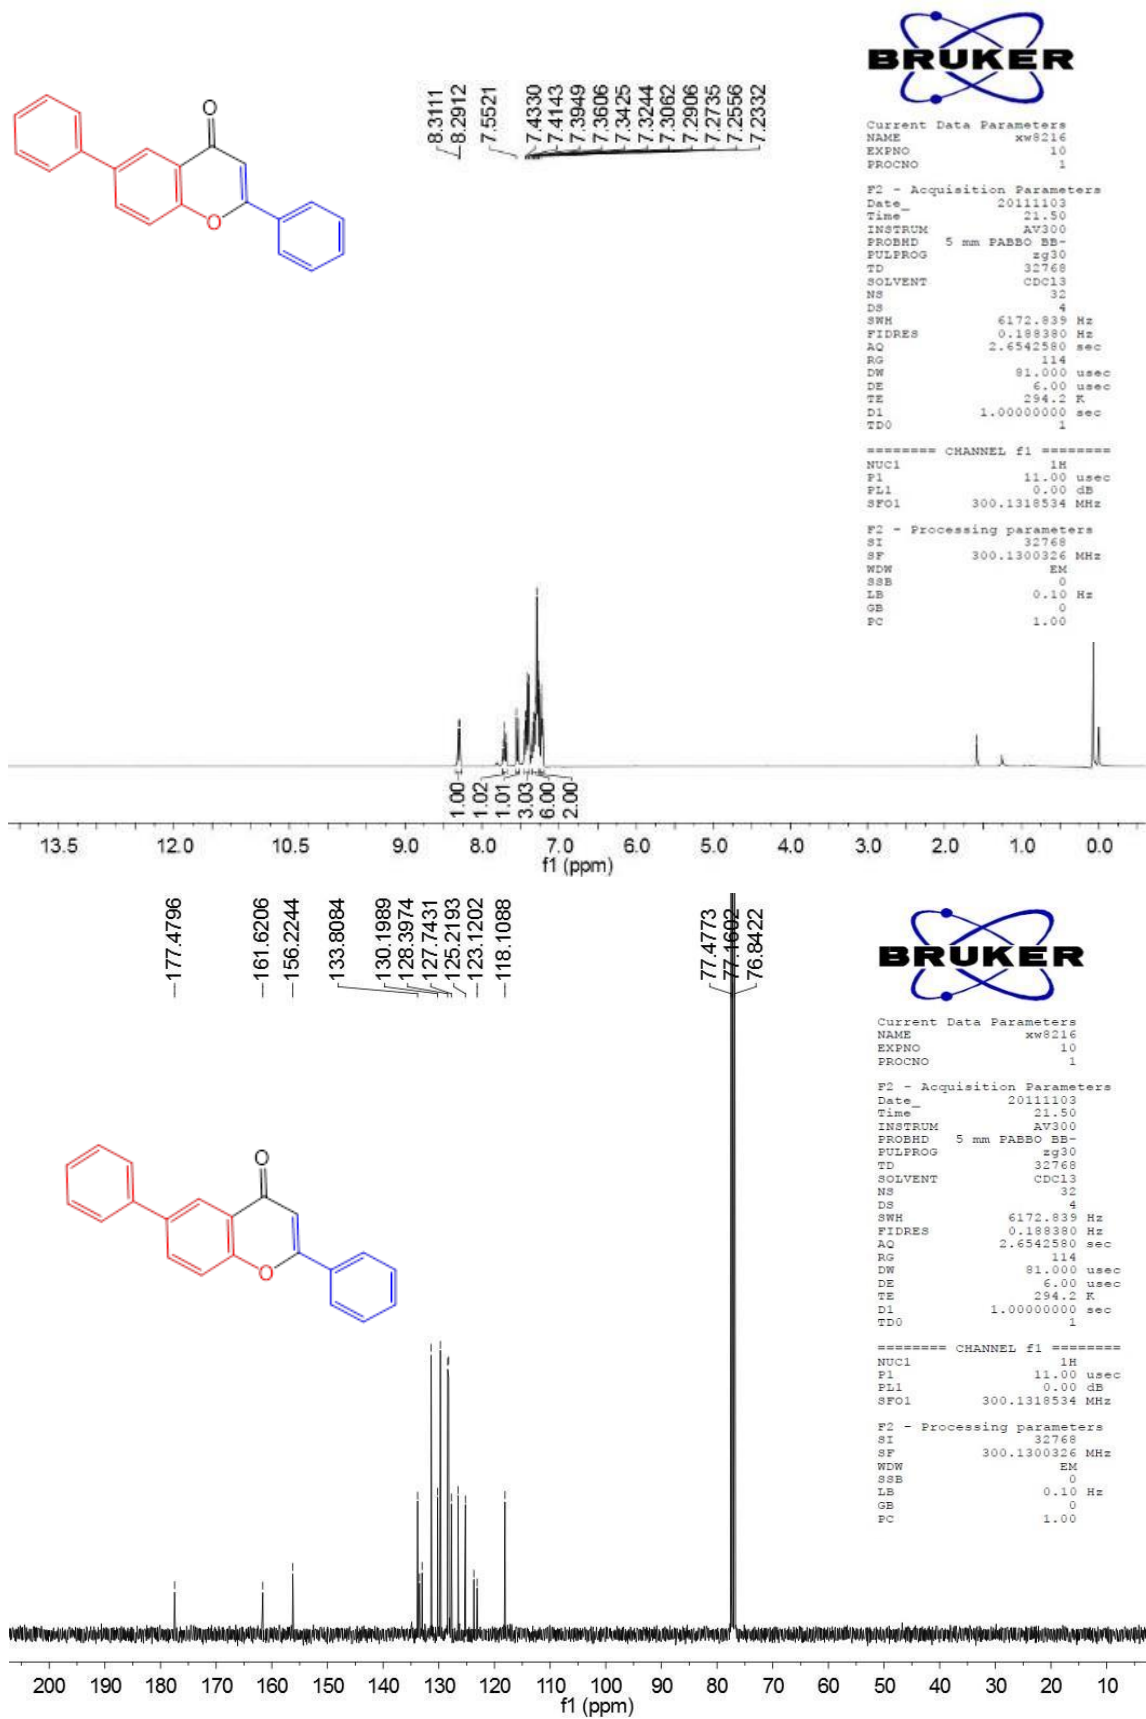

Figure S14.  $^1\text{H}$  NMR and  $^{13}\text{C}$  NMR spectra of product 3da



CP64\_CDC13\_H1  
9 july 2019

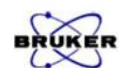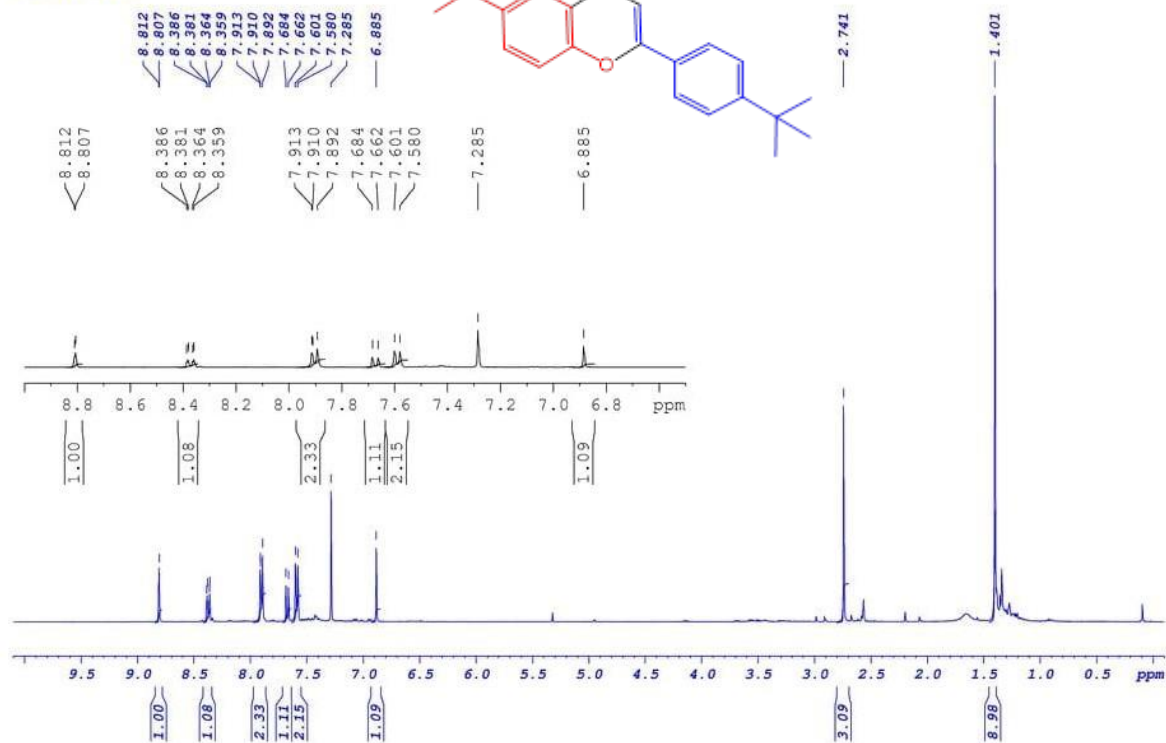

CP64\_CDC13\_13C1  
10 July 2019  
BBO Probe

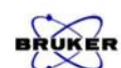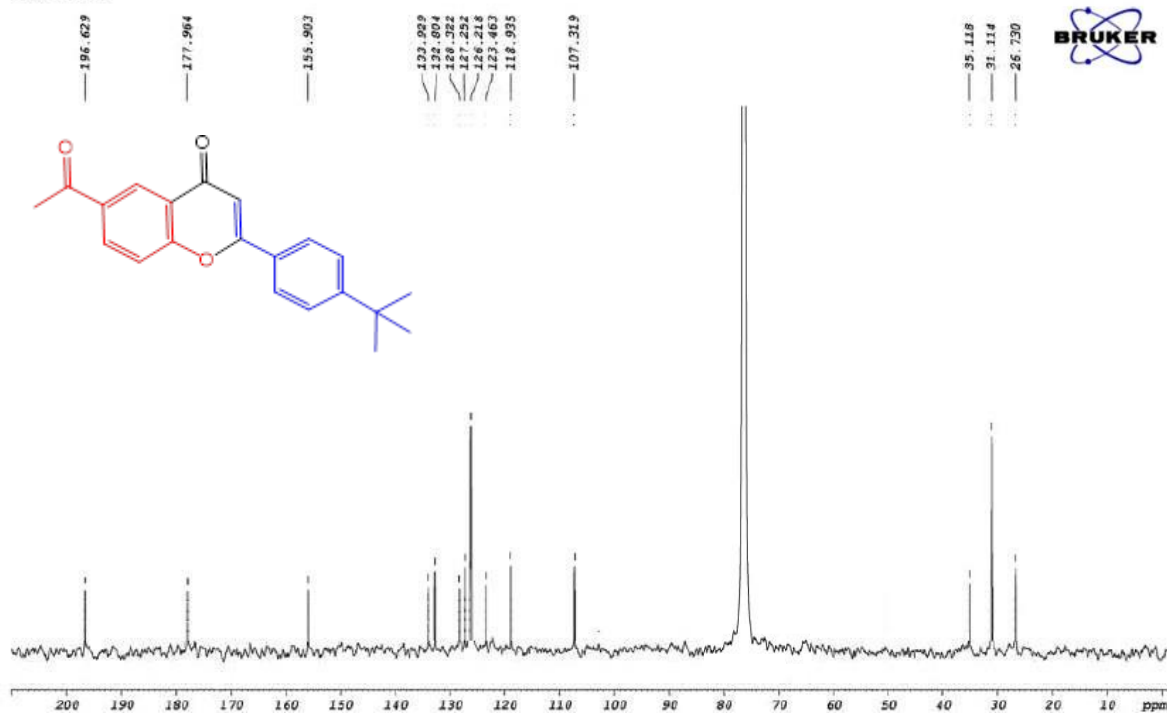

Figure S15. <sup>1</sup>H NMR and <sup>13</sup>C NMR spectra of product 3bd

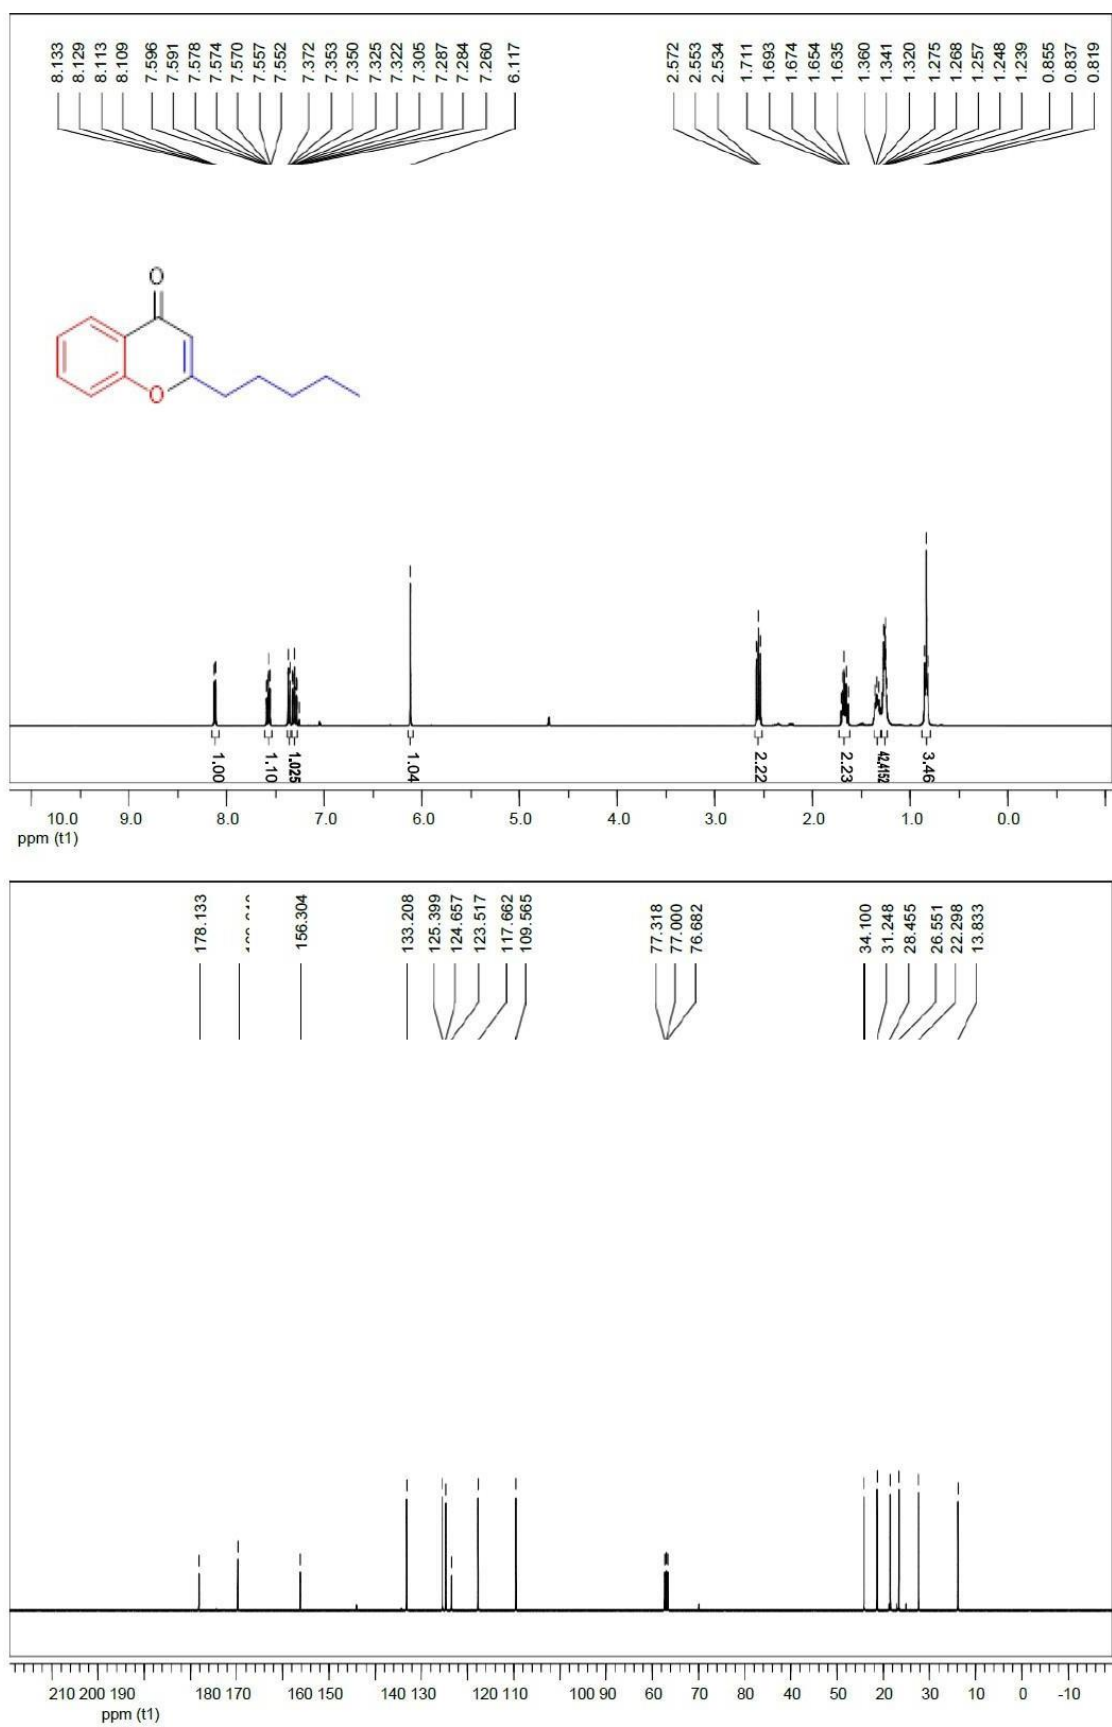

**Figure S16.** <sup>1</sup>H NMR and <sup>13</sup>C NMR spectra of product 6aa

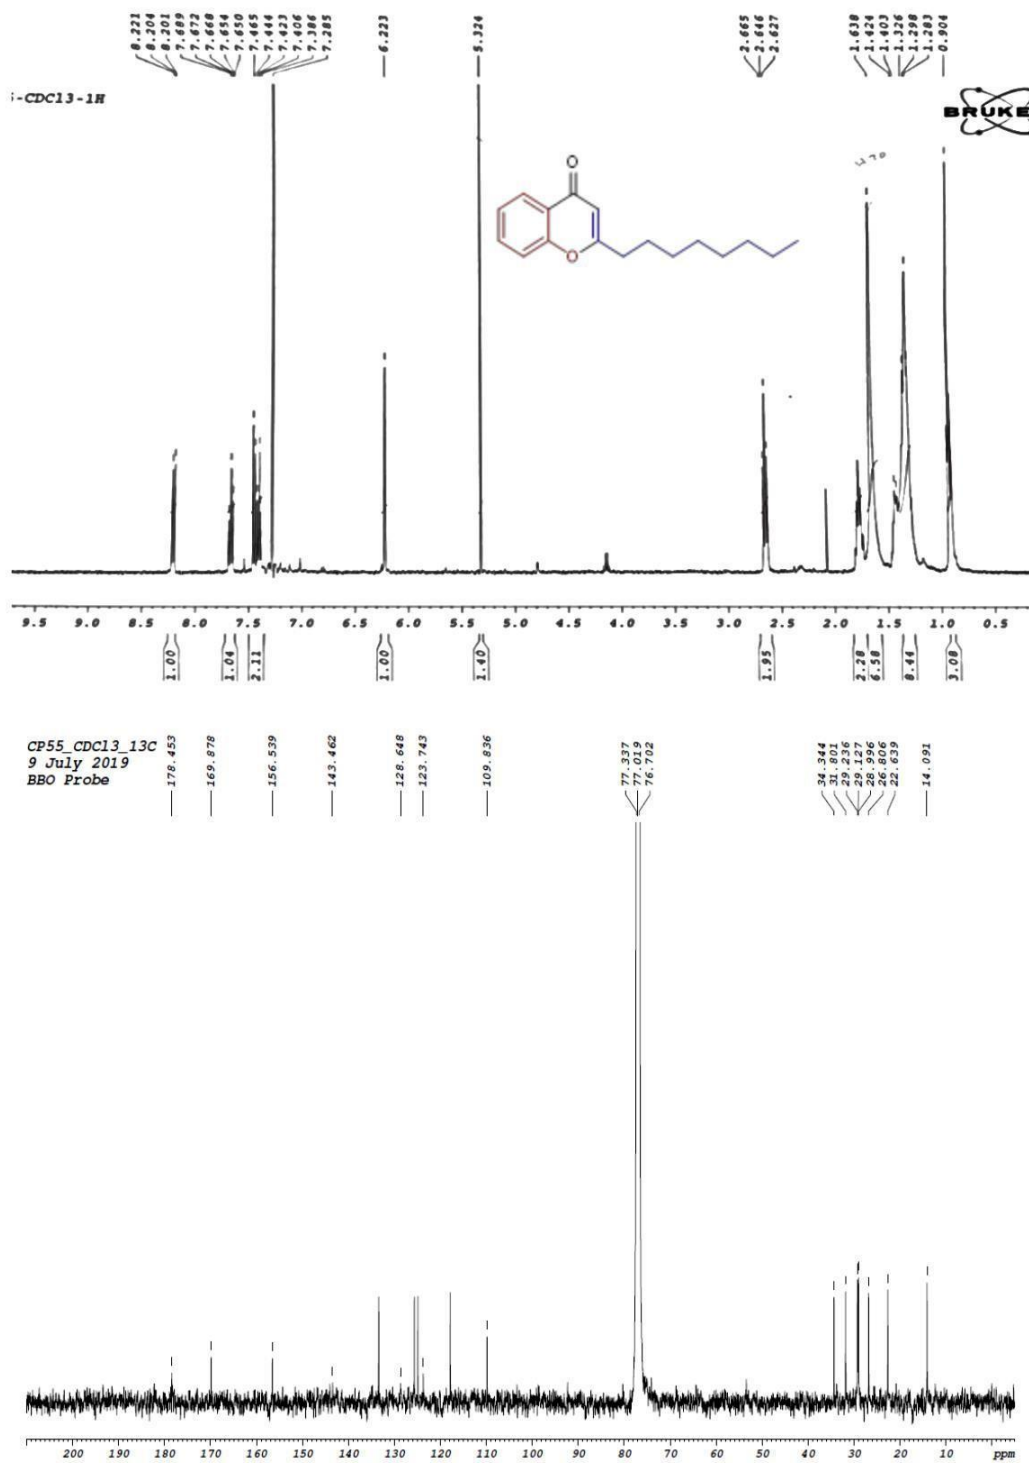

Figure S17. <sup>1</sup>H NMR and <sup>13</sup>C NMR spectra of product 6ab

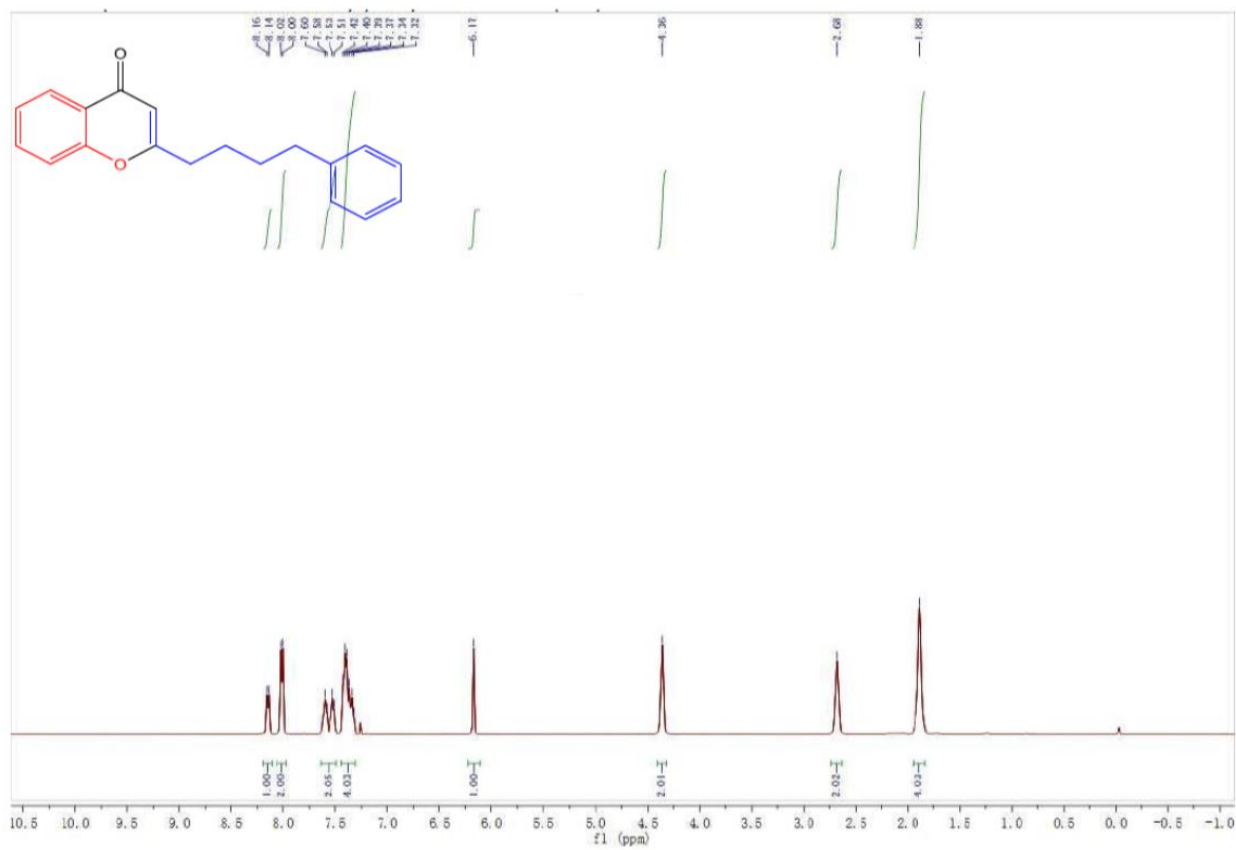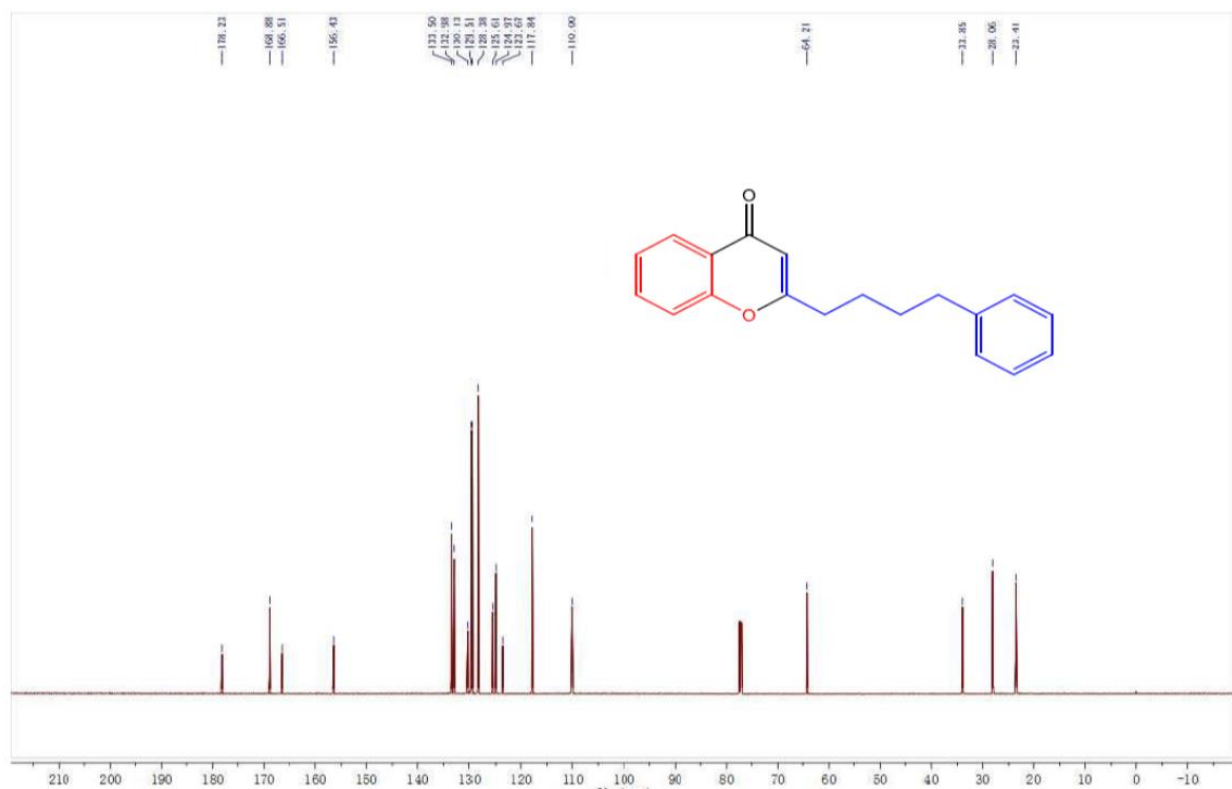

**Figure S18.** <sup>1</sup>H NMR and <sup>13</sup>C NMR spectra of product 6ac

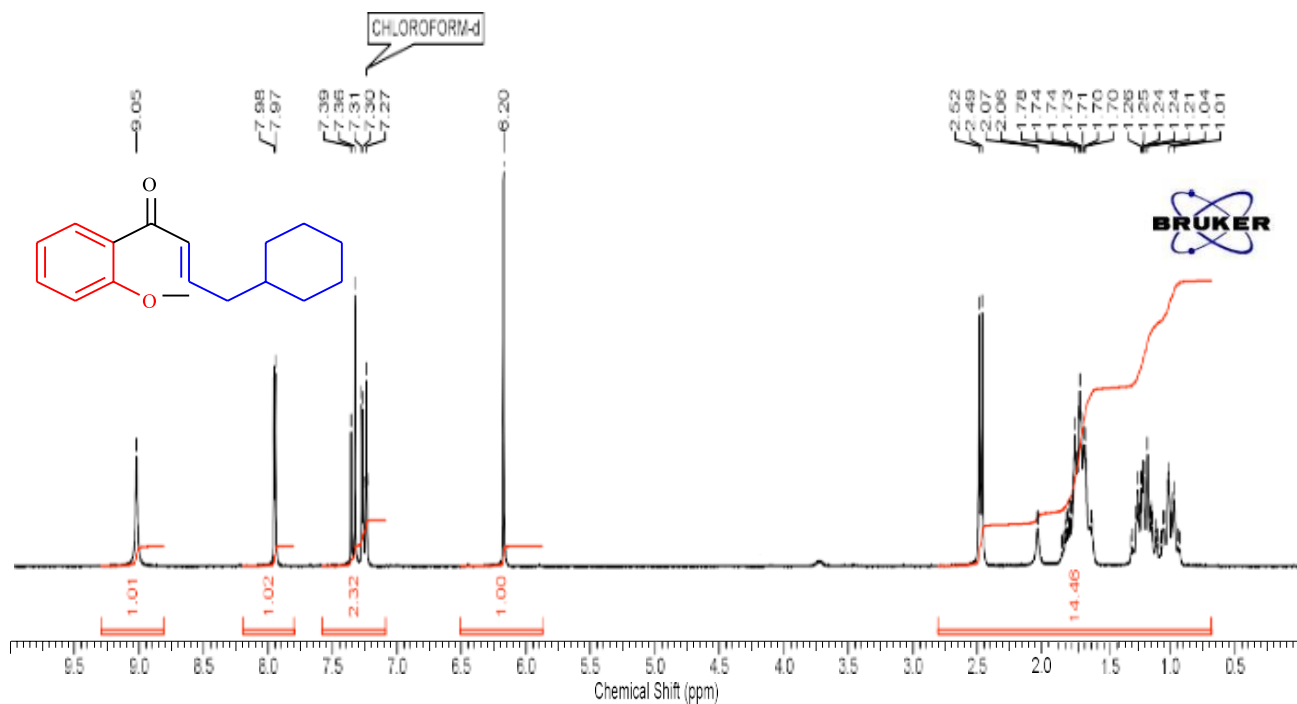

CP5CDCl13C1  
9 July 2019  
BBO Probe

178.453  
169.878  
156.539  
143.462  
128.648  
123.743  
109.836  
77.337  
77.019  
76.702  
34.344  
31.801  
29.236  
29.127  
28.996  
26.806  
22.639  
14.091

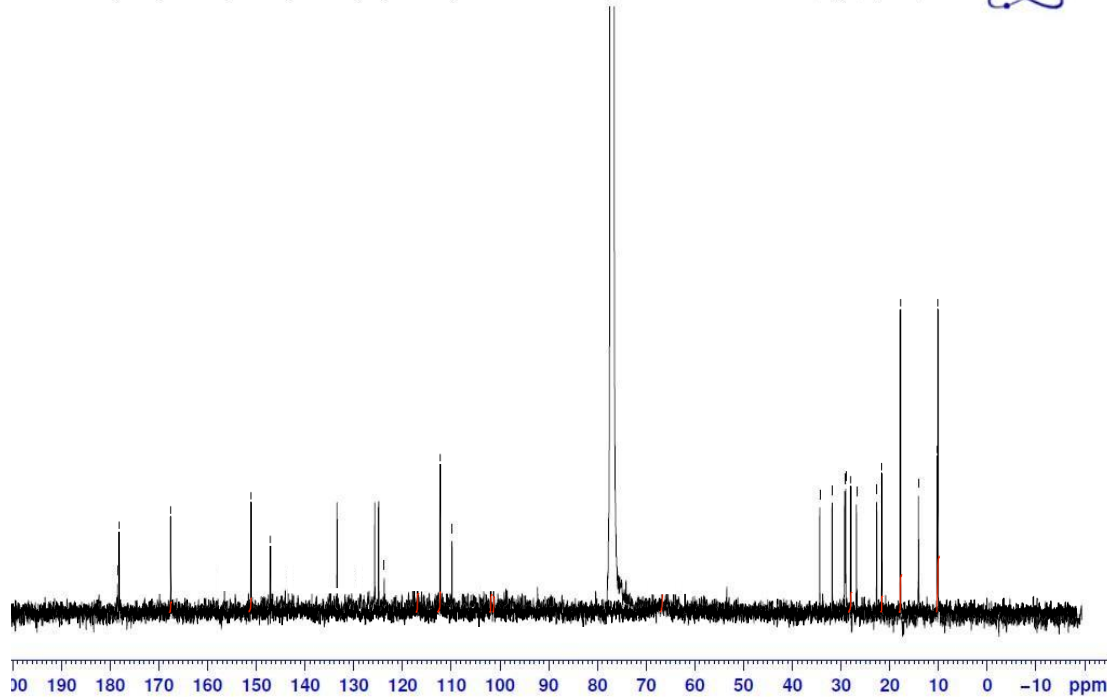

Figure S19. <sup>1</sup>H NMR and <sup>13</sup>C NMR spectra of product 6ad

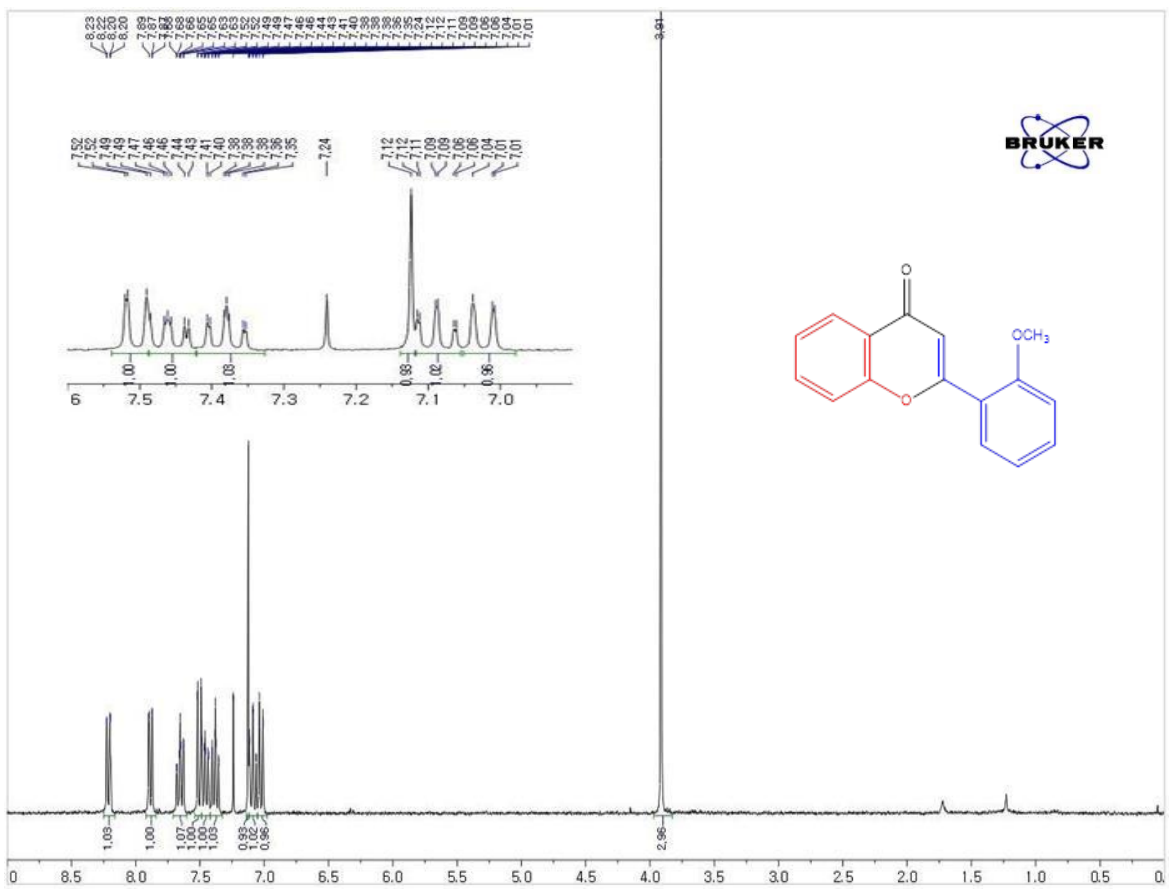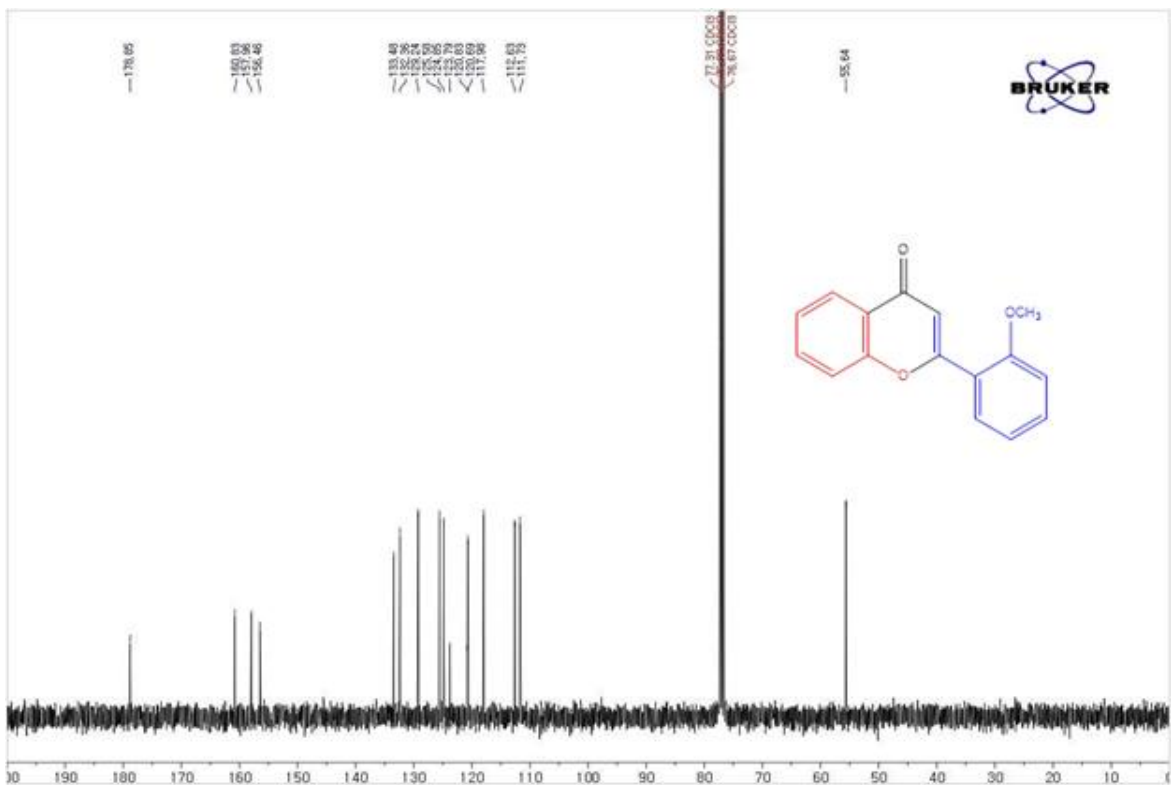

Figure S20. <sup>1</sup>H NMR and <sup>13</sup>C NMR spectra of product 3af

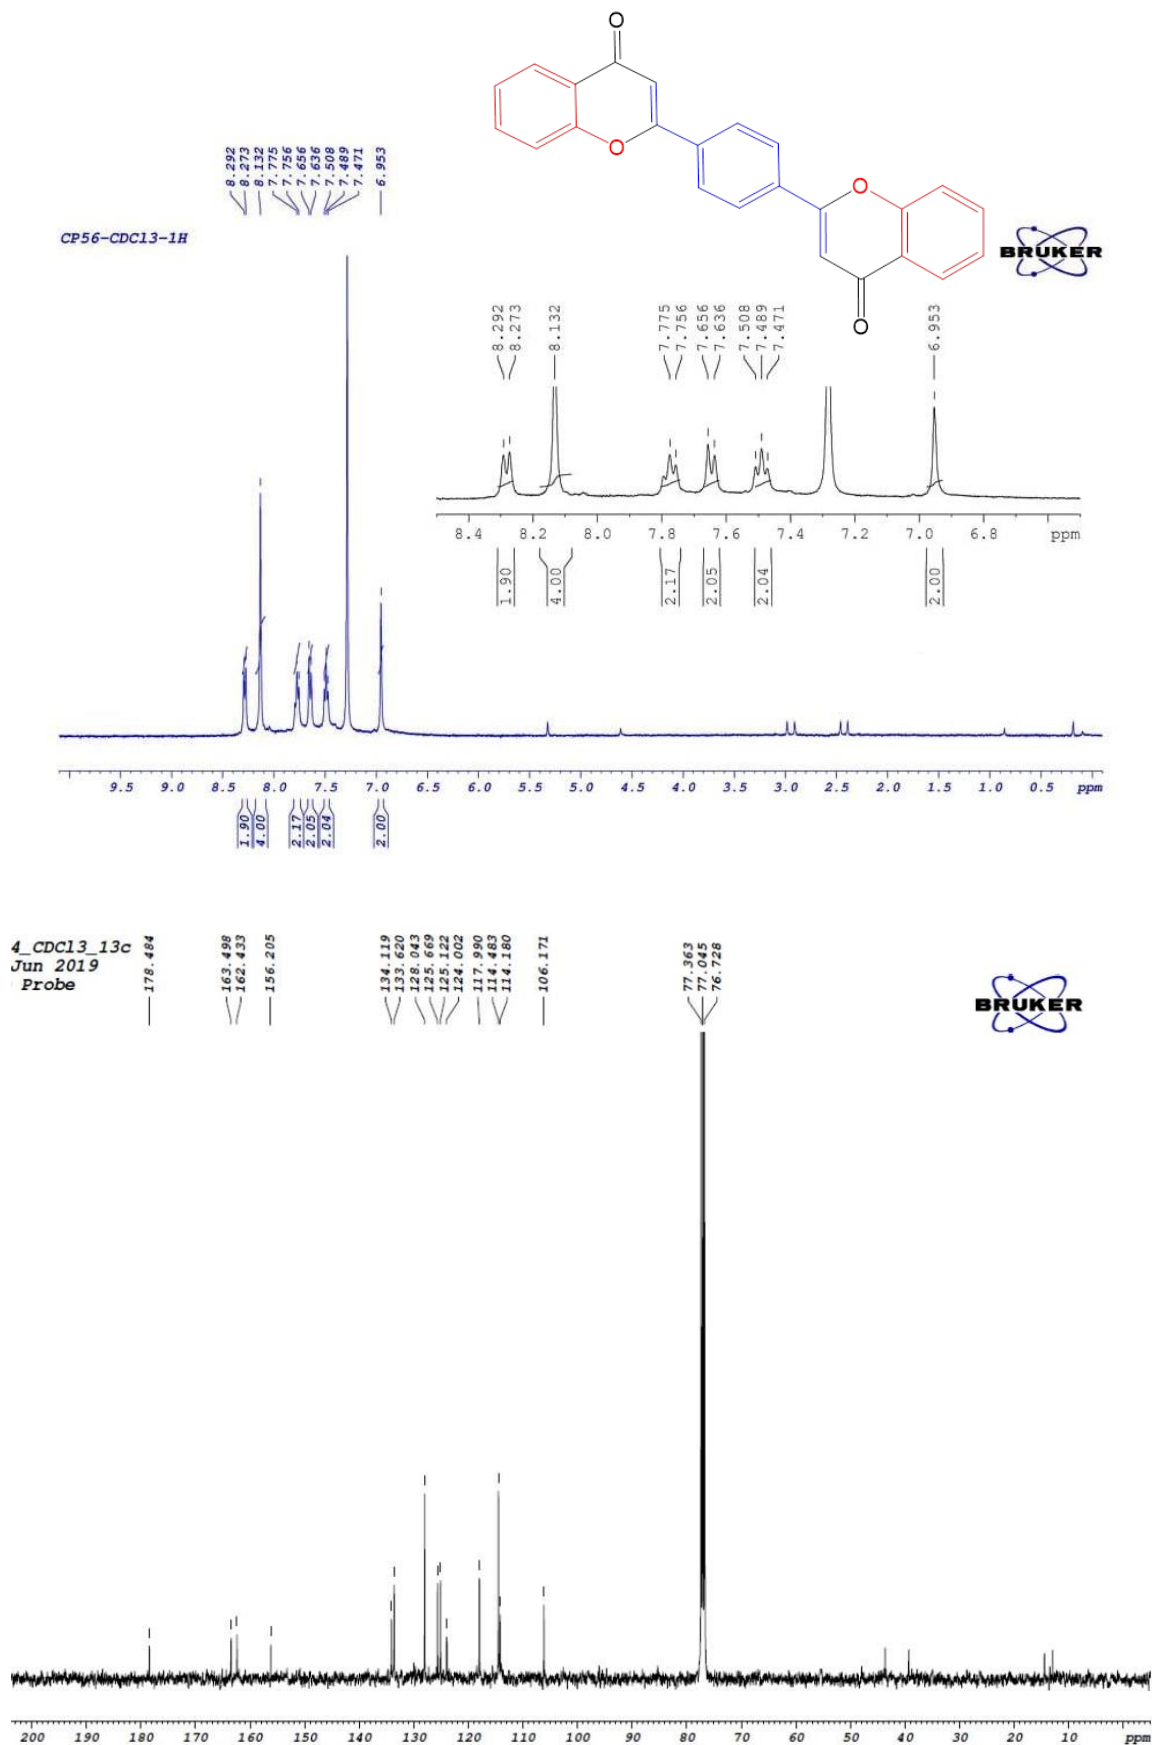

Figure S21.  $^1\text{H}$  NMR and  $^{13}\text{C}$  NMR spectra of product 8a

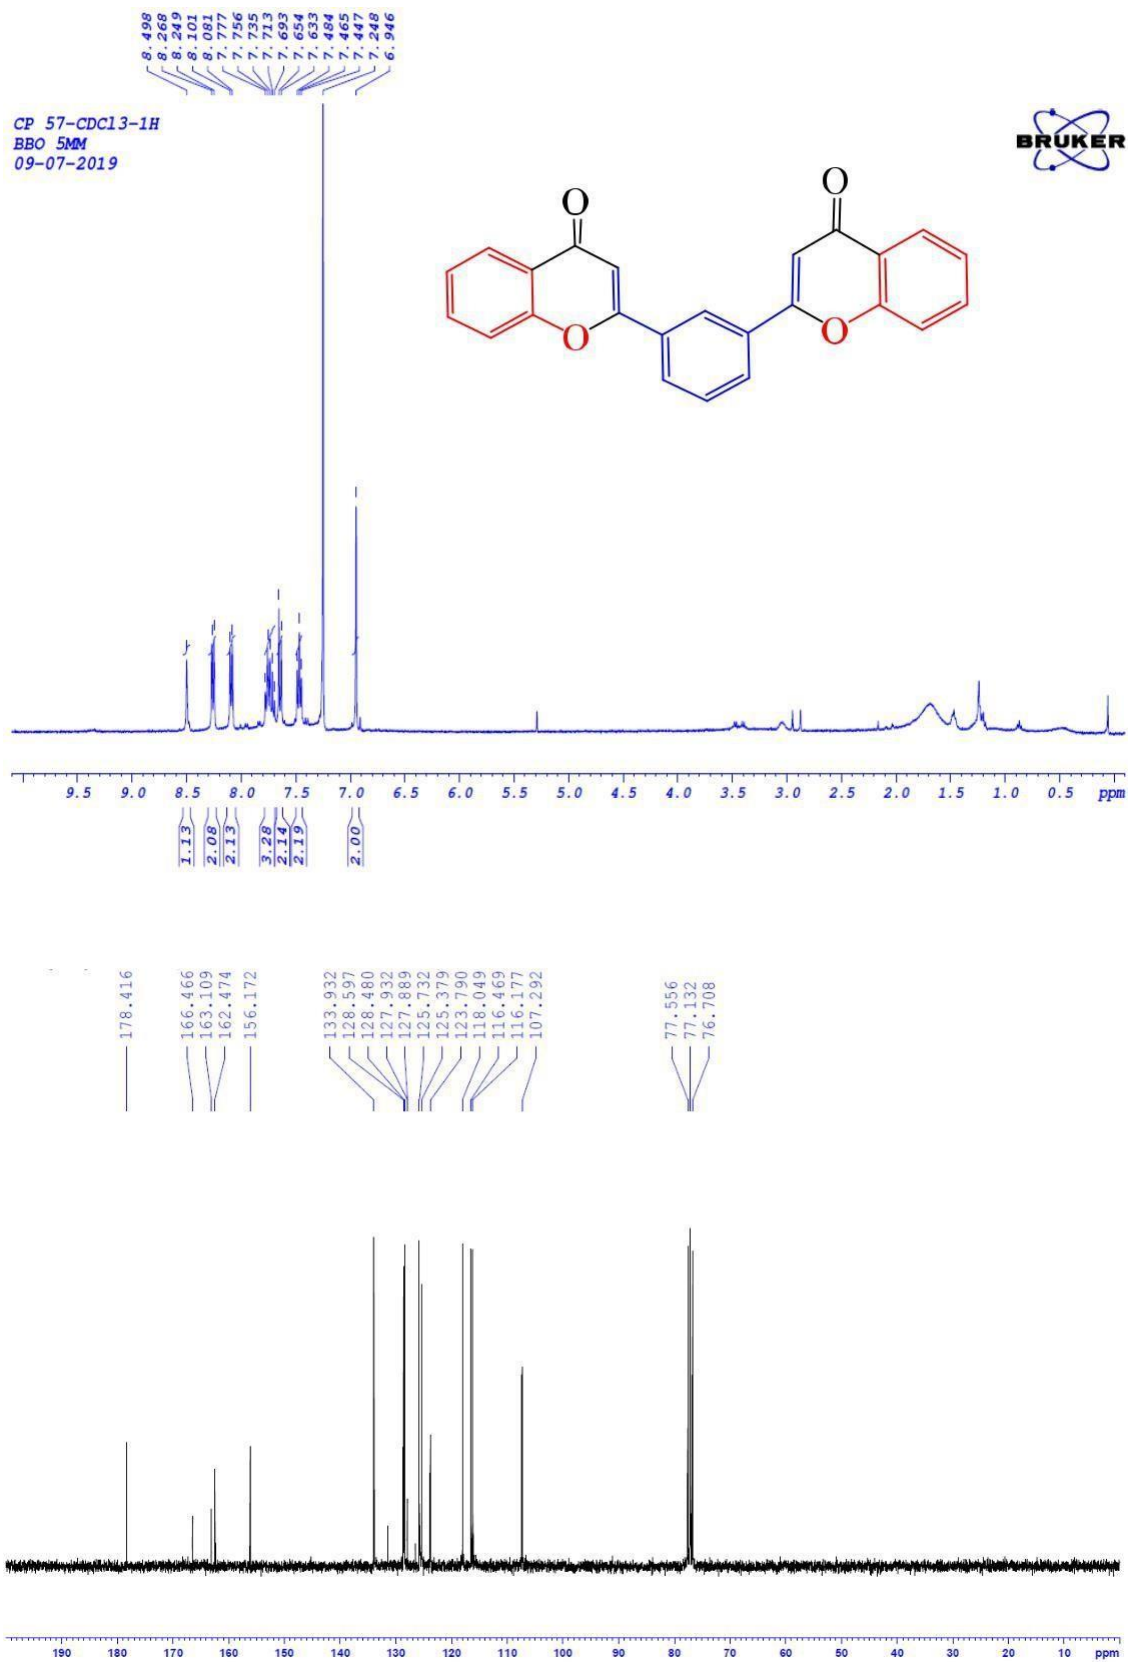

Figure S22.  $^1\text{H}$  NMR and  $^{13}\text{C}$  NMR spectra of product 8b



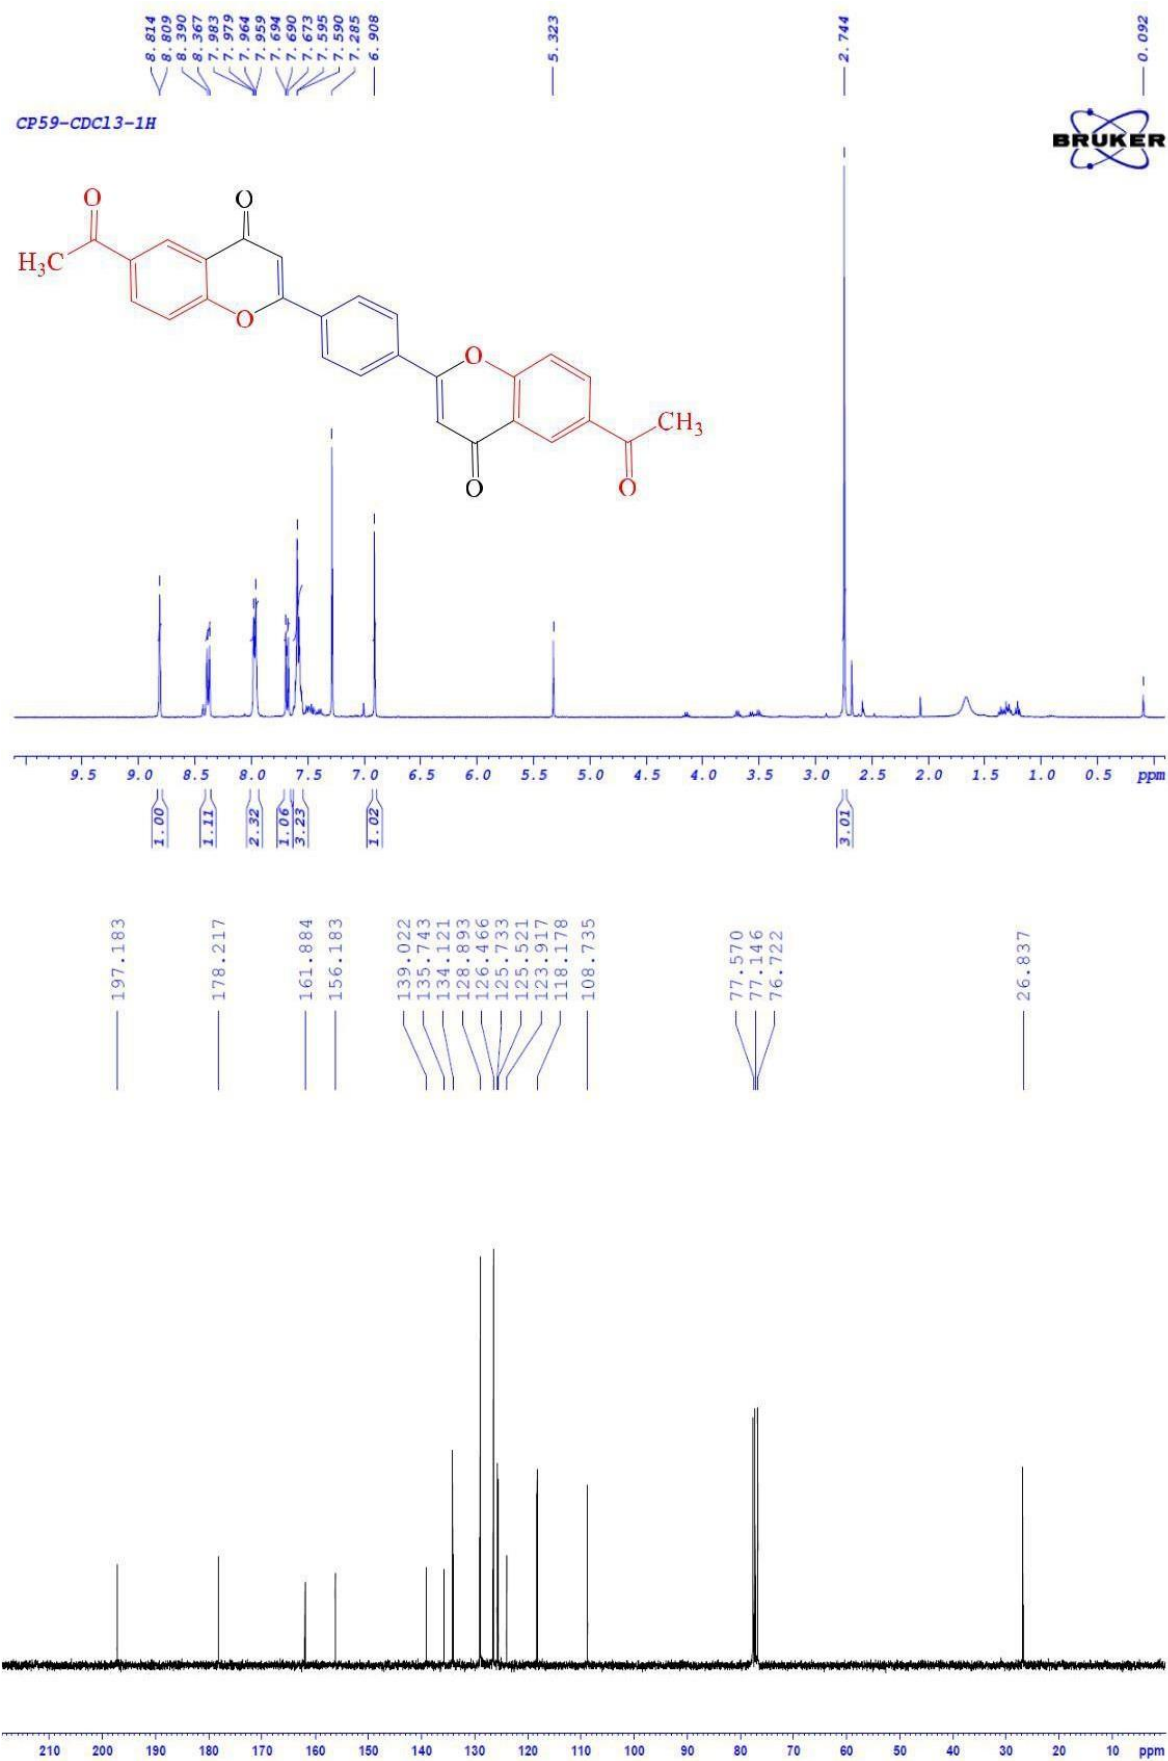

Figure S23. <sup>1</sup>H NMR and <sup>13</sup>C NMR spectra of product 8c

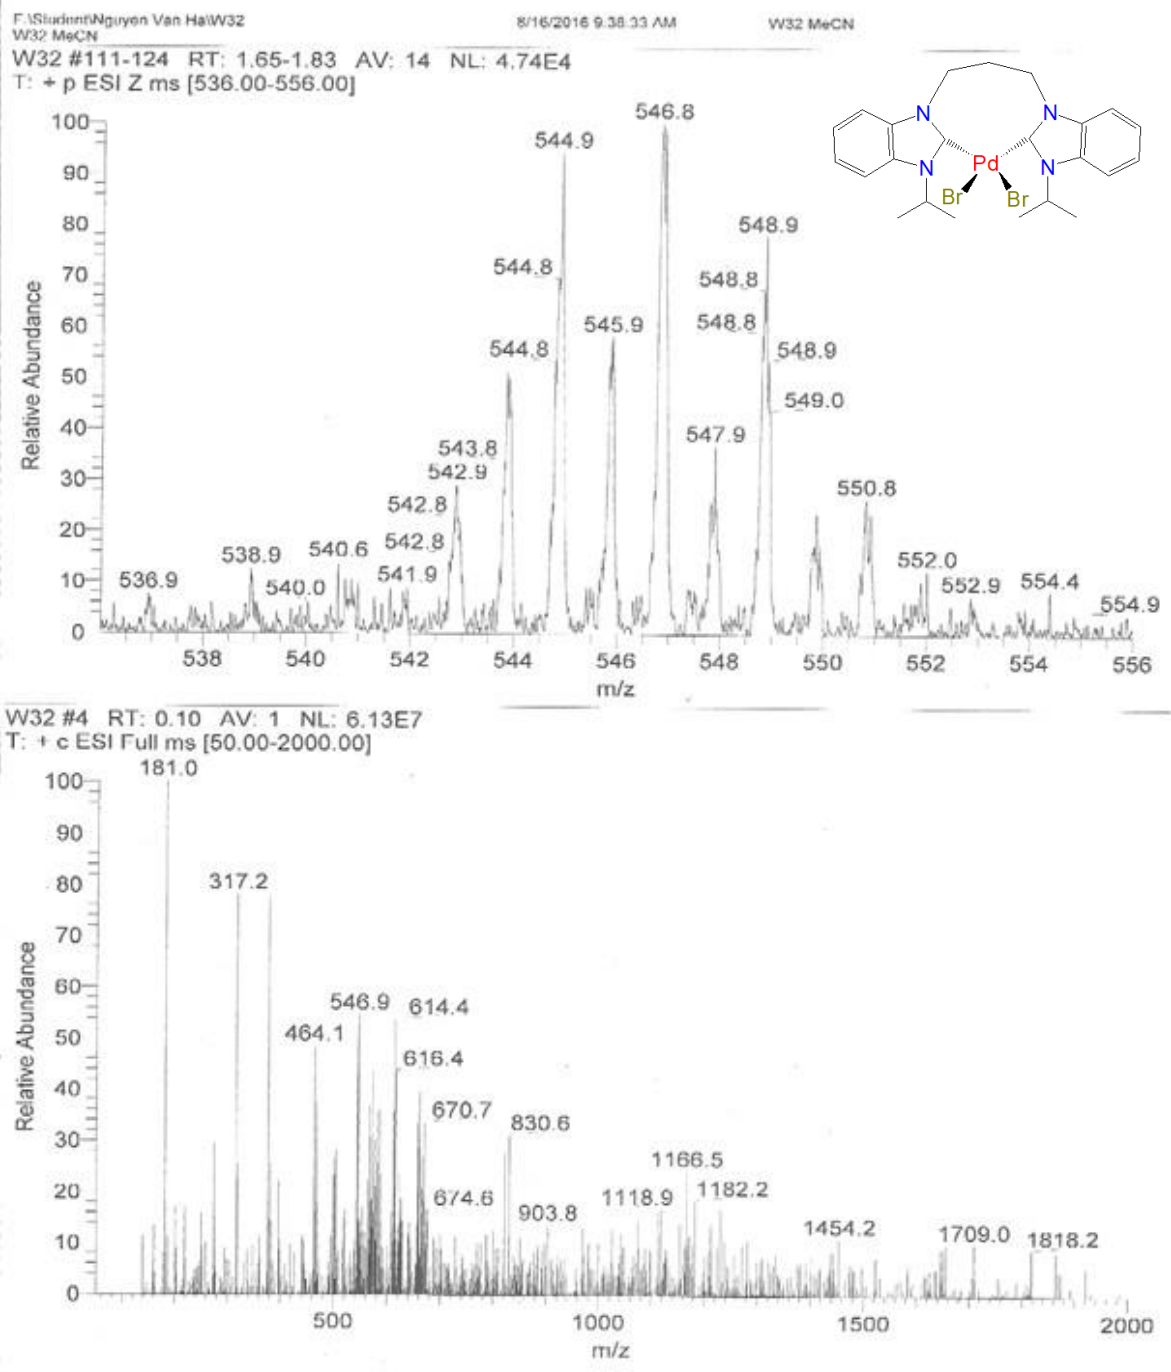

**Figure S24.** ESI spectra of complex C1

Instrument Name ESI TOF/MS  
Acq Method HRMS Full MS  
DA Method HRMS MS  
User Name Fischer  
Data Filename D:\MassHunter\Data\1611\16111709.d  
Sample Name W52D  
Position Val 42  
Comment MeOH/0.1%HOAc in H2O 90:10

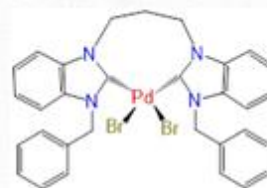

User Spectra

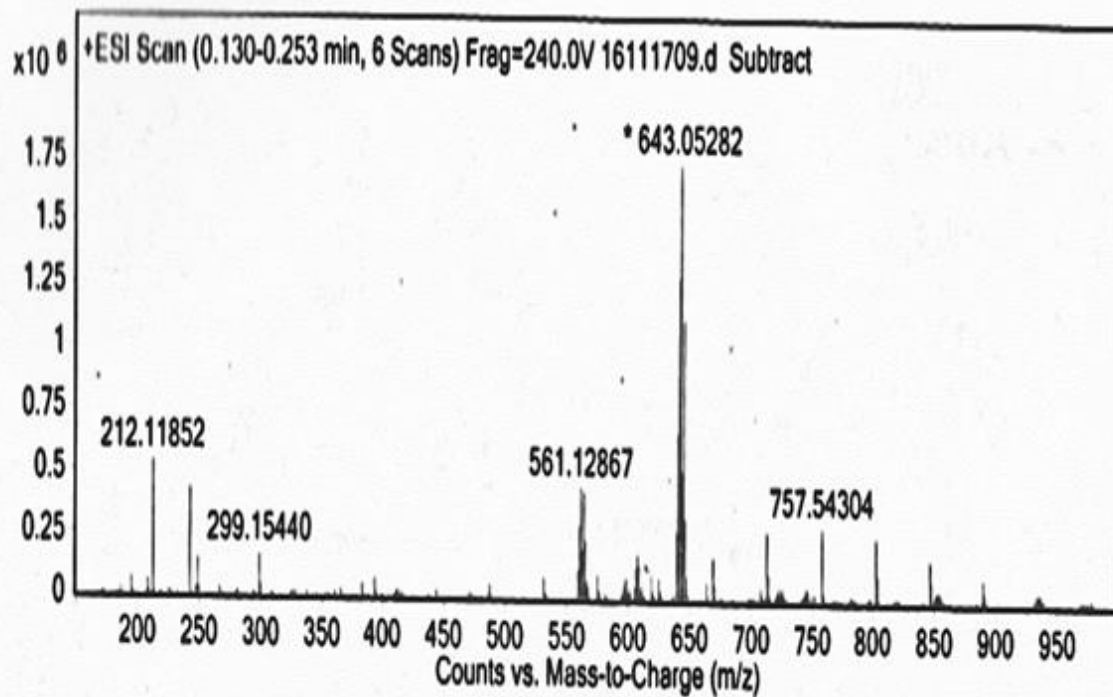

Figure S25. ESI spectra of complex C2

File\_W52 May 22 2019 #2-456 RT: 0.00-2.00 AV: 455 NL: 3.53E3  
T: ITMS + c ESI Full ms [66.00-2000.00]

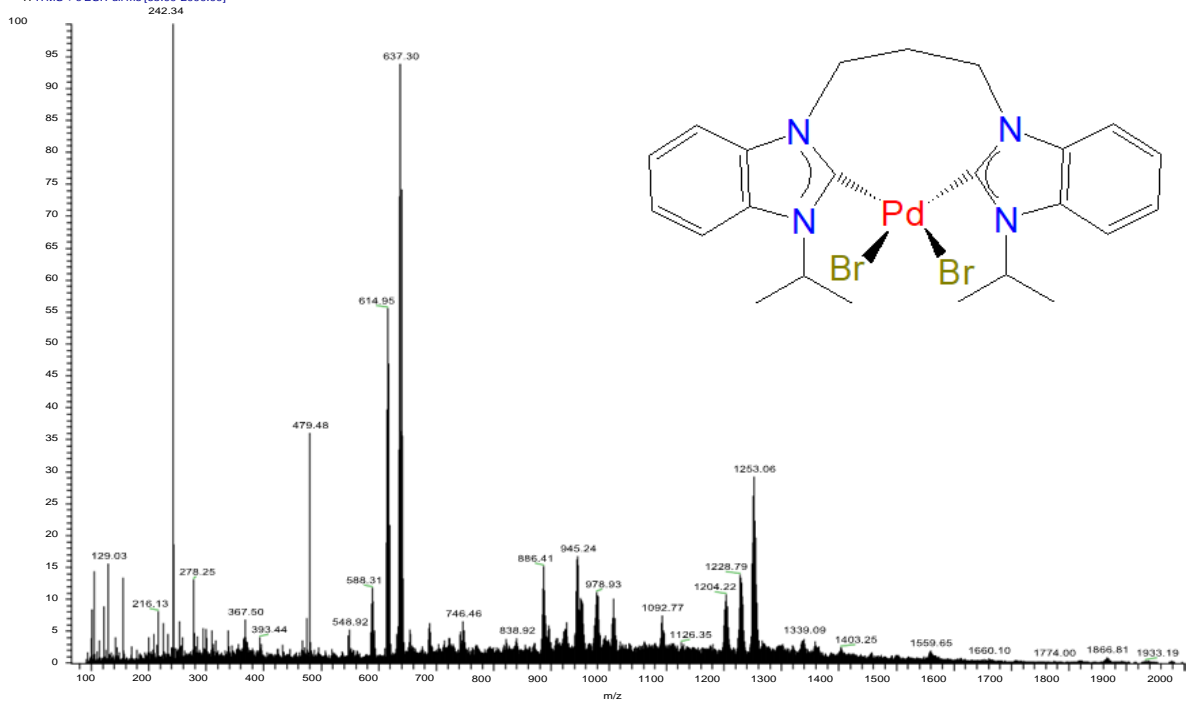

**Figure S26.** ESI spectra of complex C3
